1       **Mapping QTL associated with resistance to avian oncogenic Marek's**  
2       **Disease Virus (MDV) reveals major candidate genes and variants**

3               Short title: Candidate genes for Marek's Disease resistance

4  
5    Jacqueline Smith<sup>1\*</sup>, Ehud Lipkin<sup>2</sup>, Morris Soller<sup>2</sup>, Janet E. Fulton<sup>3</sup>, David W. Burt<sup>1#</sup>

6  
7  
8    <sup>1</sup>The Roslin Institute & R(D)SVS, University of Edinburgh, Easter Bush, Midlothian EH25  
9    9RG, UK

10   <sup>#</sup>Current address: Queensland Biosciences Precinct, 306 Carmody Road, University of  
11   Queensland, St Lucia QLD 4072, Australia

12   <sup>2</sup>Dept. of Genetics, The Alexander Silberman Institute of Life Sciences, The Hebrew  
13   University of Jerusalem, Edmond J. Safra Campus, Givat Ram, Jerusalem 91904, Israel

14   <sup>3</sup>Hy-Line International, PO Box 310, 2583 240th St., Dallas Center, IA 50063, USA

15   \*Corresponding author

16  
17  
18   **Author emails:**

19   Jacqueline Smith: [Jacqueline.smith@roslin.ed.ac.uk](mailto:Jacqueline.smith@roslin.ed.ac.uk)

20   Ehud Lipkin: [ehud.lipkin@mail.huji.ac.il](mailto:ehud.lipkin@mail.huji.ac.il)

21   Morris Soller: [soller@mail.huji.ac.il](mailto:soller@mail.huji.ac.il)

22   Janet Fulton: [jfulton@hyline.com](mailto:jfulton@hyline.com)

23   David W. Burt: [d.burt@uq.edu.au](mailto:d.burt@uq.edu.au)

24

## 25 **Abstract**

26 Marek's Disease (MD) represents a significant global economic and animal welfare issue.  
27 Marek's Disease Virus (MDV) is a highly contagious oncogenic and highly immune-  
28 suppressive alpha-herpes virus, which infects chickens, causing neurological effects and  
29 tumour formation. Though partially controlled by vaccination, MD continues to have a  
30 profound impact on animal health and on the poultry industry. Genetic selection provides an  
31 alternative and complementary method to vaccination. However, even after years of study, the  
32 genetic mechanisms underlying resistance to MDV remain poorly understood. The MHC is  
33 known to play a role in disease resistance, along with a handful of other. In this study, one of  
34 the largest to date, we used a multi-faceted approach to identify QTL regions (QTLR)  
35 influencing resistance to MDV, including an F<sub>6</sub> population from a full-sib advanced intercross  
36 line (FSIL) between two elite commercial layer lines differing in resistance to MDV, RNA-seq  
37 information from virus challenged chicks, and genome wide association study (GWAS) from  
38 multiple commercial lines. Candidate genomic elements residing in the QTLR were further  
39 tested for association with offspring mortality in the face of MDV challenge in 8 pure lines of  
40 elite egg-layer birds. Thirty-eight QTLR were found on 19 chicken chromosomes. Candidate  
41 genes, miRNAs, lncRNAs and potentially functional mutations were identified in these  
42 regions. Association tests were carried out in 26 of the QTLR, using 8 pure lines of elite egg-  
43 layer birds. Numerous candidate genomic elements were strongly associated with MD  
44 resistance. Genomic regions significantly associated with resistance to MDV were mapped,  
45 and candidate genes identified. Various QTLR elements were shown to have strong genetic  
46 association with resistance. These results provide a large number of significant targets for  
47 mitigating the effects of MDV infection on both poultry health and the economy – whether by  
48 means of selective breeding, improved vaccine design or gene-editing technologies.

49

50 **Keywords:** Marek's Disease Virus, QTL, GWAS, transcriptomics, FSIL, disease resistance,  
51 candidate gene

52

### 53 **Author summary**

54 Marek's Disease has a huge impact on the global poultry industry in terms of both animal  
55 welfare and economic cost. For many years, researchers have sought to identify the genes  
56 underlying resistance to Marek's Disease Virus (MDV). However, this is a complex trait with  
57 each genetic locus having a small effect, so identifying causal genes and variants is no easy  
58 task. To date, it is known that the MHC confers differing susceptibility/resistance. A few other  
59 non-MHC genes have also been implicated in disease resistance, although based on  
60 experimental inbred lines and not representing real world commercial poultry. Using an F<sub>6</sub>  
61 intercross population of birds with differences in MDV survival, we have identified many  
62 regions of the genome involved in resistance and highlighted candidate genes, miRNAs and  
63 lncRNA. Access to DNA from phenotyped birds spanning 15 generations of 8 elite commercial  
64 lines has provided a unique opportunity for us to show genetic association of markers in these  
65 transcripts with MDV survival. This genetic study, the largest to date, provides novel targets  
66 for mitigation of Marek's Disease within the poultry industry. This could be through selective  
67 breeding strategies, improved vaccine design or future gene editing technologies.

68

69

## 70 **Introduction**

71       Marek's Disease (MD) represents a significant global economic and animal welfare  
72 issue. This immunosuppressive disease is responsible for an estimated 2 billion USD annual  
73 economic loss to the global poultry industry [1], through bird mortality, lost egg production  
74 and vaccination costs. The virus responsible, Marek's Disease Virus (MDV), is an alpha-herpes  
75 virus that initially infects B-cells, experiences a latency period and can then proceed to develop  
76 as an oncogenic disease after infection of T-cells [2]. Furthermore, if birds do not succumb to  
77 MDV itself, they are often left severely compromised with secondary infections such as *E. coli*  
78 [3]. The commercially utilized vaccines are not sterilizing vaccines. They prevent the formation  
79 of tumours, but do not prevent infection by MDV or shedding of the pathogenic virus [4]. Both  
80 vaccine and pathogenic MDVs are found in vaccinated flocks, resulting in the emergence of  
81 increasingly more virulent strains [5]. As more virulent strains emerge, vaccine treatments are  
82 becoming less and less effective [6].

83       In the race to keep ahead of this viral evolution, genetic selection is a possible tool to aid  
84 in breeding for viral resistance. Indeed, genetic selection following multiple generations of  
85 progeny challenge has been shown to improve survival in commercial chicken populations [7].  
86 Selection in the poultry industry works relatively well, but knowing the causative elements for  
87 resistance would provide a route for much more precise selection. However, the underlying  
88 genetic changes, and the genes and specific variants impacting this genetic resistance are still  
89 largely unknown. For decades, researchers have sought to identify the genes responsible for  
90 MDV resistance, with limited success. It has become clear that many QTL/genes are involved  
91 in the resistance phenotype, with resistance not being a simple trait with one or a few major  
92 genes but a classic quantitative trait with many genes of small effect, thus making it difficult  
93 to identify causal variants [8].

94 Marek's Disease is also of interest from a clinical perspective, as it can serve as a model  
95 for human lymphoma. MDV-induced lymphomas are found to over-express the Hodgkin's  
96 disease antigen CD30, with expression correlating with the viral Meq oncogene [9]. Indeed,  
97 after infection, the chicken CD30 promoter has also been shown to be hypo-methylated [10].  
98 Identifying the genetic mechanisms underlying MDV resistance is therefore not only of great  
99 importance to the poultry industry but will also have implications for increasing our  
100 understanding of human cancers.

101 Different MHC haplotypes are known to confer different susceptibilities to the virus [11-  
102 13]. Studies have also reported the influence of non-MHC regions on resistance to MDV [14].  
103 Several studies have implicated specific genes in MDV resistance/susceptibility. These include  
104 *GHI* [15], *SCYCI* [16], *SCA2* [17], *IRGI* [18], *CD79B* [19] and *SMOCI* and *PTPN3* [20].  
105 These studies are usually done, not with relevant commercial lines, but with experimental or  
106 inbred lines and examine whole tissues, although recent work has investigated the host  
107 response to MDV in specific cells such as macrophages, which are an early target for the virus  
108 [21,22]. Recent studies on the role of lncRNAs [23,24] and miRNAs (in both the host and  
109 virus) have also been carried out [25-27], including study of serum exosomes from lymphoma-  
110 bearing birds [28]. In addition, the role of epigenetics in resistance to MDV has been studied,  
111 with regions of differential methylation between susceptible and resistant lines of birds  
112 highlighted [29,30].

113 Here, the availability of large-scale, phenotyped commercial populations, genome wide  
114 analysis technologies and an F<sub>6</sub> advanced intercross line [31], has given us the opportunity to  
115 carry out, for the first time, a high-resolution analysis of genes underlying MDV resistance in  
116 commercially relevant populations. We use multiple genetic resources at our disposal,  
117 including the F<sub>6</sub> population of an advanced full-sib inter-cross line (FSIL) previously analysed  
118 in a low-resolution study for MD resistance using microsatellite markers to identify genomic

119 regions associated with survival following MD challenge [31]. Genomic DNA of the original  
120 10 founder individuals and the subsequently produced F<sub>6</sub> was available for fine mapping  
121 through genome sequencing, and/or genotyping using a genome-wide 600K SNP chip [32].  
122 Furthermore, an extensive multi-generation (15) and multi-line (8) collection of DNAs from  
123 progeny-challenged males was available to further examine candidate genes and related  
124 variants associated with survival in the face of MDV infection.

125 In this report we reveal for the first time MD as a true complex trait, controlled by many  
126 QTL. Integration of multiple lines of evidence (F<sub>6</sub>, multi-generation/multi-line collection, host  
127 gene expression responses to viral infection, genome annotations, etc.) on a large scale enabled  
128 a high-resolution analysis that predicted mutations within genes, miRNAs and lncRNAs highly  
129 associated with MDV response in commercial egg production lines. This analysis not only  
130 provides new markers for MD resistance but also reveals more about the biology behind the  
131 mechanism of MDV susceptibility, information that should lead to more precise selection  
132 strategies in the future.

133

## 134 **Materials and methods**

### 135 **Experimental animals**

#### 136 *Full Sib Advanced Inter-cross Line (FSIL)*

137 F<sub>6</sub> birds from the FSIL were used to map QTL affecting MD resistance. The development  
138 of the FSIL F<sub>6</sub> challenge population has been previously described [31,33,34]. It was initiated  
139 from a cross of two partially inbred commercially utilized elite White Leghorn lines, known to  
140 differ in their resistance to MDV. Five independent FSIL families were developed and  
141 expanded over five generations. In all five families, the male parent was from the more resistant  
142 line and the female parent was from the less resistant line.

143           At the F<sub>6</sub> generation, 1,615 chicks were challenged with vv+ MDV strain 686 following  
144 the protocol of Fulton et al. [7]. The experiment was carried out in two hatches; it was  
145 terminated at 152 days of age in the first hatch, and after 145 days of age in the second.  
146 Resistance was measured as survival time (age at death). For birds that survived to the end of  
147 the experiment, survival time was taken as age at end of the experiment. To standardise the two  
148 hatches, survival for all birds that survived to end of experiment was set to 149 days. This  
149 measure of resistance was used in all association tests.

150           This population was segregating for two MHC haplotypes (B<sup>2</sup> and B<sup>15</sup>). Given the known  
151 strong association of MHC-type with MD resistance, all analyses were done within MHC-type  
152 within each family.

153

#### 154 *Pure line Pedigreed sire populations with daughter progeny records for MDV mortality*

155           As part of the routine selection process within the Hy-line (HL) breeding program,  
156 individual males were mated to multiple females to produce 30 half-sib female progeny per  
157 sire. The dams were MD vaccinated following normal industry practices. Progeny were  
158 vaccinated at 1 day of age with HVT/SB1 and at 7 days of age inoculated subcutaneously with  
159 500 PFU of vv+ MDV (provided by Avian Disease and Oncology Lab, East Lansing MI).  
160 Mortality was recorded from 3 to 17 weeks of age (termination of experiment), as described in  
161 Fulton et al. [7]. The sire MD tolerance phenotype is the proportion of mortality among the  
162 daughters upon MD challenge, with no signs of MD at the termination of the experiment.

163           Data were available from 15 generations of 8 elite lines (not the same generations in all  
164 lines), with 1,081 to 1,393 males per line having MD progeny mortality data, for a total of  
165 9,391 males. The lines included three different egg production breeds, namely five White  
166 Leghorn lines, two White Plymouth Rock lines and one Rhode Island Red line. Pedigreed sires

167 and their progeny from these pure lines were used to test functional genomic elements (genes,  
168 miRNAs, lncRNAs in the mapped QTL regions (QTLR)), for association with MD progeny  
169 mortality. Also tested were a group of singleton coding SNPs predicted to have deleterious  
170 effects on protein structure and function (henceforth, potentially functional mutations, see  
171 below for details).

172

### 173 **Genomic sequencing of founder birds of the FSIL**

174 Genome sequence information was produced for the 10 F<sub>0</sub> founder individuals of the F<sub>6</sub>  
175 population. This was used to identify variants that differed in the genomes of the parental birds  
176 and may have functional impact. Sequencing the DNA from the 10 F<sub>0</sub> founder birds was carried  
177 out by the Edinburgh Genomics sequencing facility (Edinburgh, UK). Samples were prepared  
178 for sequencing using 1 ug of genomic DNA following the TruSeq PCR free kit protocol  
179 (Illumina, FC-121-3001). Resulting libraries were quality checked on an Agilent DNA 1000  
180 bioanalyzer (Agilent Technologies, South Queensferry, UK) and then clustered onto HiSeq  
181 Rapid V2 flow cell at a concentration of 15 pM. Sequencing was carried out on an Illumina  
182 HiSeq 2500 using the HiSeq Rapid v2 SBS reagents (Illumina, Little Chesterford, UK), for 150  
183 cycle paired end reads. Each of the 10 samples was sequenced to around 15x coverage. Quality  
184 of sequences was determined using FastQC [35], and mapping to the chicken reference genome  
185 (Galgal4) was carried out using BWA (v0.7.0) [36]. The resulting bam file was sorted with  
186 Samtools (v0.1.18) [37]. Picard tools (v1.95) was then used to add read groups and mark  
187 duplicates [<http://broadinstitute.github.io/picard/>]. The mpileup program within Samtools  
188 carried out SNP calling (with options: -q20 -Q20 -AB -ugf) and these variants were then  
189 filtered using the bcftools package within Samtools (v0.1.18).

190



## 191 **Annotation of genome variants**

192 Variants distinguishing the genomes of the F<sub>6</sub> parental birds were classified as exonic -  
193 synonymous or non-synonymous, intronic, 5'-upstream, 3'-downstream or intergenic, as  
194 determined by the SNPEff program (v3.6c) [38]. Non-synonymous coding variants were  
195 further designated as predicted to be highly deleterious to protein function (henceforth,  
196 "potentially functional mutations"), moderately deleterious or having a low likelihood of being  
197 deleterious to protein function. In all, a total of 5,718,725 - 6,154,628 variants (in all 5 males  
198 v all 5 females) were annotated within each sample. Some of the identified variants were used  
199 to test the QTLR, as described below.

200

## 201 **600K high density SNP genotyping of F<sub>6</sub> birds**

202 F<sub>6</sub> birds were genotyped genome-wide with the high density 600k Affymetrix SNP array  
203 [32] for GWAS. DNA was available from 1,615 MDV challenged birds. After quality control  
204 (QC), 1,192 F<sub>6</sub> birds provided high quality genotypes (178, 234, 357, 221 and 202 birds from  
205 Families 1 to 5, respectively). Genotyping was performed using 200 ng of gDNA with the  
206 standard protocol for the Axiom Affymetrix platform (Affymetrix). Samples were amplified  
207 using the Axiom 2.0 Reagent Kit (#901758, Thermo Fisher Scientific), and the resultant  
208 product checked for both quantity and quality of fragmentation. QC was performed using  
209 absorbance assay for quantity and running a sample on a 4% agarose E-Gel (#G800804,  
210 Thermo Fisher Scientific) to check for fragmentation. The samples were then hybridised to the  
211 Axiom Chicken Genotyping array (#902148, Thermo Fisher Scientific). Hybridisation, wash,  
212 stain and scanning were carried out within the GeneTitan MC Instrument. The resulting .CEL  
213 files were loaded into Axiom Analysis Suite (v2.0) for first stage analysis.

214

## 215 **GWAS of the F<sub>6</sub> population to identify MD resistance QTL**

216 The F<sub>6</sub> genotypes were used to map QTL that impacted survival following MDV  
217 challenge. After applying Affymetrix standard QC the remaining markers were further filtered  
218 to remove markers with minor allele frequency  $\leq 0.01$  and markers with significant deviation  
219 from Hardy–Weinberg Equilibrium ( $P \leq 0.001$ ). An independent GWAS was then carried out  
220 within each of the 5 families of this study, using JMP Genomics SNP-Trait association Trend  
221 test (JMP Genomics, Version 9, SAS Institute Inc., Cary, NC, 1989-2019). Survival to the end  
222 of the experiment was taken as the Censor Variable; age at death was taken as a survival trait  
223 and MHC as a class variable and fixed effect. To obtain experimental significance thresholds,  
224 the Proportion of False Positives (PFP) [39,40] was used to correct for multiple tests.

225

## 226 **Identification of QTL and their confidence intervals**

227 Although many marker x family combinations were nominally significant to highly  
228 significant (comparison wise  $P \leq 0.05$  to  $P \leq 0.001$ ), very few remained significant after PFP  
229 corrections for multiple tests. Nevertheless, visual inspection of the chromosomal Manhattan  
230 plots by families showed distinct clusters of markers with high  $-\text{LogP}$  values intermixed with  
231 markers with low  $-\text{LogP}$  values (**Figure 1**). Therefore, following Lipkin et al. [41], we  
232 identified QTL by using a moving average of  $-\text{LogP}$  (mAvg) to smooth the Manhattan plots.  
233 We used a window size of  $\sim 0.1$  Mb (27 markers) with step size of 1 marker and a critical  
234 threshold mAvg of  $-\text{LogP} = 2.0$  ( $P = 0.01$ ) to declare significance, and Log drop 1 [42] to define  
235 QTLR boundaries.

236 Many QTLR had overlapping boundaries across two or more families, thus providing  
237 replication and increased assurance of significance. Conservatively assuming such overlaps  
238 represents the same underlying genetic element, we combined these QTLR within and across

239 families, taking the start and end log-drop boundaries of the QTLR as the first upstream and  
 240 last downstream marker across all families in the QTLR. **Table 1** shows final list of 38 QTLR  
 241 after consolidation within and across families. Also shown are the number of genes (Ensembl  
 242 database v79) and non-coding RNAs [43] found in each QTLR

243 **Table 1. Mapped QTLRs.**

| QTLR | Chr | Start       | End         | Length    | Genes | lncRNAs |
|------|-----|-------------|-------------|-----------|-------|---------|
| 1    | 1   | 8,854,589   | 9,261,317   | 406,729   | 0     | 1       |
| 2    | 1   | 13,268,810  | 14,294,877  | 1,026,068 | 12    | 34      |
| 3    | 1   | 52,012,381  | 52,517,953  | 505,573   | 2     | 4       |
| 4    | 1   | 71,738,977  | 73,085,956  | 1,346,980 | 16    | 28      |
| 5    | 1   | 75,288,912  | 77,765,499  | 2,476,588 | 86    | 79      |
| 6    | 1   | 91,482,501  | 91,803,475  | 320,975   | 10    | 9       |
| 7    | 1   | 101,761,945 | 104,477,713 | 2,715,769 | 31    | 37      |
| 8    | 1   | 109,395,871 | 110,913,451 | 1,517,581 | 20    | 32      |
| 9    | 1   | 169,656,958 | 172,228,091 | 2,571,134 | 32    | 44      |
| 10   | 1   | 174,394,951 | 175,634,386 | 1,239,436 | 23    | 33      |
| 11   | 1   | 194,193,118 | 194,788,548 | 595,431   | 18    | 23      |
| 12   | 2   | 15,960      | 883,257     | 867,298   | 45    | 20      |
| 13   | 2   | 46,423,161  | 46,868,789  | 445,629   | 11    | 12      |
| 14   | 2   | 105,493,833 | 108,988,920 | 3,495,088 | 34    | 47      |
| 15   | 2   | 125,168,753 | 127,089,304 | 1,920,552 | 25    | 34      |
| 16   | 2   | 138,767,830 | 139,701,774 | 933,945   | 4     | 7       |
| 17   | 3   | 108,220,206 | 109,260,649 | 1,040,444 | 13    | 9       |
| 18   | 4   | 8,308,498   | 11,268,107  | 2,959,610 | 54    | 99      |
| 19   | 4   | 84,393,173  | 88,579,400  | 4,186,228 | 68    | 73      |
| 20   | 5   | 7,568,851   | 8,147,837   | 578,987   | 4     | 3       |
| 21   | 5   | 18,806,924  | 19,673,354  | 866,431   | 4     | 3       |
| 22   | 6   | 2,077,640   | 2,709,412   | 631,773   | 19    | 13      |
| 23   | 6   | 29,536,109  | 29,817,337  | 281,229   | 10    | 16      |
| 24   | 6   | 31,006,769  | 31,448,342  | 441,574   | 7     | 6       |
| 25   | 7   | 13,062,871  | 16,436,053  | 3,373,183 | 55    | 82      |
| 26   | 10  | 22,643      | 1,713,384   | 1,690,742 | 63    | 28      |
| 27   | 11  | 7,397,790   | 8,440,259   | 1,042,470 | 9     | 28      |
| 28   | 12  | 8,996,686   | 9,432,693   | 436,008   | 15    | 16      |
| 29   | 13  | 10,363,430  | 12,176,727  | 1,813,298 | 27    | 40      |
| 30   | 14  | 8,085,563   | 9,335,685   | 1,250,123 | 38    | 50      |
| 31   | 14  | 13,138,194  | 15,087,518  | 1,949,325 | 82    | 41      |
| 32   | 16  | 1,630       | 490,907     | 489,278   | 47    | 14      |
| 33   | 17  | 3,442,598   | 5,634,042   | 2,191,445 | 64    | 84      |
| 34   | 18  | 3,196,488   | 4,093,129   | 896,642   | 22    | 32      |
| 35   | 24  | 4,489,675   | 5,514,833   | 1,025,159 | 42    | 32      |
| 36   | 26  | 4,378,168   | 5,036,699   | 658,532   | 22    | 17      |
| 37   | 27  | 1,540,112   | 2,270,461   | 730,350   | 23    | 11      |
| 38   | 28  | 1,282,726   | 1,571,011   | 288,286   | 15    | 12      |

244  
 245

246 QTLR - ordinal number of the QTLR after consolidation within and across families (see Methods); Chr -

247 chromosome; Start/End - Galgal4 QTLR coordinates of the first and last SNP in the QTLR; Length - Size of the  
248 QTLR (bp); Genes and lncRNA - number of genes (Ensembl database v79) and non-coding RNAs [43] found in  
249 the QTLR

250

## 251 **RNA-Seq analysis**

### 252 *MDV challenge experiment*

253 An experiment measuring host response to MDV viral strain 686 challenge (based on  
254 gene expression measured by a whole genome RNA-seq assay) was carried out with 10 male  
255 and 10 female birds from HL W36 commercial production hybrids. The parental lines used to  
256 produce the W36 commercial hybrid are closely related to the lines used to develop the F<sub>6</sub>  
257 experimental cross. Previously it was reported that males are more resistant to MD than females  
258 [44-46]. On this basis, we compared Differentially Expressed Genes (DEGs) of males and  
259 females as surrogate for comparison of chicks from more- and less-resistant lines. Hence,  
260 gender balanced groups were used for the RNA-seq challenge experiment, with 5 males + 5  
261 females in each of the challenged and control groups. This allowed us to identify viral response  
262 genes in each sex. Thus, this experiment included 4 comparisons: Females - challenged v  
263 control; Males - challenged v control; Controls - males v females; Challenged - males v  
264 females. Although some of the DEGs in the cross-sex comparisons will be due to sex rather  
265 than response to MDV, others can be expected to reveal some of the genes behind the host  
266 immune responses and potential differential susceptibility.

267 To reflect infection in the field, ten 6-day old HL W36 commercial birds (5 males + 5  
268 females) were infected with 500 pfu of the very virulent plus (vv+) MDV strain 686, by  
269 subcutaneous injection in the neck (virus kindly provided by the USDA/Avian Disease and  
270 Oncology Lab, East Lansing, Michigan). All birds were vaccinated at 1 day of age with  
271 HVT/SB1 vaccine. Spleen tissues from these 10 challenged and from 10 unchallenged control  
272 birds were harvested at 4 dpi, flash frozen in liquid nitrogen and stored at -80°C for subsequent

273 RNA preparation and RNA-Seq analysis. All birds were housed together, with challenged and  
274 control chicks separated by 2.44 meters.

#### 275 *RNA preparation*

276 RNA was prepared from the 4-dpi flash-frozen spleen tissues of each of the above 20  
277 chicks after homogenization in Qiazol reagent (Qiagen, Manchester, UK), and subsequent  
278 preparation using RNeasy RNA isolation kit (Qiagen, Manchester, UK) as per the  
279 manufacturer's guidelines. RNA was resuspended in dH<sub>2</sub>O.

#### 280 *Transcriptomic sequencing and analysis*

281 Strand-specific 100 bp paired-end RNA-Seq was carried out by GATC (Konstanz,  
282 Germany) using an Illumina HiSeq2500 genome sequencer. 19,510,400 – 26,596,800 reads  
283 representing at least 15x coverage were produced for each sample. Sequencing quality was  
284 assessed by means of FastQC [35] and reads mapped to the reference genome (Galgal4) with  
285 Tophat2 (v2.0.14) [47] using the Bowtie2 aligner (v2.2.3) [48]. Untrimmed reads with stated  
286 insert sizes were mapped using the Ensembl 79 genome annotation. 78.1% of reads mapped to  
287 the Galgal4 reference genome. The Cuffdiff package within Cufflinks (v2.2.1) was used to  
288 quantify transcripts and determine differential expression between experimental groups [49].

289

#### 290 **QTLR tests**

291 *Selection of candidate genomic elements underlying the 38 QTLR for further testing and*  
292 *validation in the 8 HL elite pure lines.*

293 In principal a random selection of markers from a QTLR region could be used for testing  
294 in the 8 elite-sire validation populations. However, we decided to take a step forward, and  
295 search the QTLR for attractive candidate elements that could tested in the validation  
296 populations. The assumption being that for a marker to show association across a number of

297 populations, it must be in high LD with the causative mutation in all of these populations. For  
298 this to hold, the marker must be very close to the causative mutation, which is what we would  
299 expect for markers taken from the quantitative trait element itself.

300

### 301 *Identification of candidate genes within QTLR*

302 The BioMart data mining tool within the Ensembl database (release 79) was used to  
303 identify genes lying under the 38 QTLR identified from the F<sub>6</sub> data (**Table 1**). This information  
304 was then compared with the gene expression data (from RNA-Seq analysis of the MDV  
305 challenge experiment) in order to identify potential candidate genes for MD resistance. The  
306 DAVID analysis tool (v6.8) (<https://david.ncifcrf.gov/home.jsp>) identified gene ontology (GO)  
307 terms associated with DEGs under each QTLR. Following this, Ingenuity Pathway Analysis  
308 software (IPA v2.3) ([https://www.qiagenbioinformatics.com/products/ingenuity-pathway-](https://www.qiagenbioinformatics.com/products/ingenuity-pathway-analysis/)  
309 [analysis/](https://www.qiagenbioinformatics.com/products/ingenuity-pathway-analysis/)) revealed which canonical pathways were perturbed by MDV infection in the host,  
310 and allowed us to analyze the gene interaction networks involved in the host response. Likely  
311 upstream regulators of differentially regulated genes were identified and DEGs in male and  
312 female birds were compared.

### 313 *Selection of genetic markers within QTLR for Genotyping*

314 Markers located in genomic elements underlying each QTLR (genes, miRNAs,  
315 lncRNAs, and potentially functional mutations) were identified from genome sequences  
316 aligned to the reference chicken genome for each of the 8 elite lines utilized in this study. SNPs  
317 predicted to alter amino acids were preferentially chosen, but variants were also selected to  
318 encompass the entire gene where possible. All SNPs selected were validated using 200 samples  
319 from cohorts separated by 13-15 generations from each line to confirm that the marker was  
320 polymorphic (i.e. identified both homozygote and heterozygote individuals), and to define the

321 minimum number of markers required to define a haplotype within each genomic element  
 322 (gene, miRNA, or lncRNA) in each line. This minimum number of SNPs was then used to  
 323 identify the haplotype status of each individual bird. The elite lines were selected for MD  
 324 resistance, but the selection was at a low level, as selection emphasis was for production-related  
 325 traits including egg numbers, shell quality and feed efficiency. If SNPs were homozygous in  
 326 both generations, then the SNP composition was assumed monomorphic for the intervening  
 327 and subsequent generations.

### 328 *Selection of candidate coding genes*

329 Twenty candidate coding genes (**Table 2**) were selected for further study in the 8 elite  
 330 sire lines based on (i) position under a QTLR defined by this or previous genetic studies, (ii)  
 331 known biology of the gene (e.g. involvement in innate immunity, cell death, or cancer), (iii)  
 332 polymorphisms (presence of variants), (iv) differential expression between challenged and  
 333 control, or more and less resistant birds - either in this or previous studies (e.g. Smith et al  
 334 2011), and (v) allele specific expression [50]. Specific details for the detection assays are  
 335 provided in **S1 Table**.

336 **Table 2. Candidate genes in the QTLRs, by location (Galgal4).**

| QTLR | Gene    | Description                                                  | Chr | Start       | End         | Length  |
|------|---------|--------------------------------------------------------------|-----|-------------|-------------|---------|
| 5    | CSTA    | Cystatin A (Stefin A)                                        | 1   | 76,253,583  | 76,258,549  | 4,967   |
| 5    | LAG3    | Lymphocyte-activation gene 3                                 | 1   | 76,676,057  | 76,678,087  | 2,031   |
| 5    | C1S     | Complement C1s subcomponent                                  | 1   | 76,859,359  | 76,868,459  | 9,101   |
| 7    | ADAMTS5 | ADAM metalloproteinase with thrombospondin type 1 motif, 5   | 1   | 102,403,453 | 102,442,746 | 39,294  |
| 8    | SUPT20H | Spt20 homolog, saga complex component                        | 1   | 171,574,831 | 171,612,194 | 37,364  |
| 10   | FLT3    | Fms related tyrosine kinase 3                                | 1   | 175,281,894 | 175,309,466 | 27,573  |
| 11   | RELT    | RELT tumor necrosis factor receptor                          | 1   | 194,551,973 | 194,555,607 | 3,635   |
| 13   | TRANK1  | Tetratricopeptide repeat and ankyrin repeat containing 1     | 2   | 46,537,531  | 46,576,714  | 39,184  |
| 19   | CTNNA2  | Gallus gallus catenin (cadherin-associated protein), alpha 2 | 4   | 86,948,459  | 87,057,215  | 108,757 |
| 29   | HAVCR1  | Hepatitis A virus cellular receptor 1 precursor              | 13  | 10,778,915  | 10,785,137  | 6,223   |
| 29   | TIMD4   | T-cell immunoglobulin and mucin domain-containing protein 4  | 13  | 10,789,088  | 10,803,683  | 14,596  |
| 30   | SOCS1   | Suppressor of cytokine signaling 1                           | 14  | 8,935,374   | 8,936,082   | 709     |
| 32   | TAP1    | Antigen peptide transporter 1                                | 16  | 67,623      | 76,124      | 8,502   |
| 32   | IL4I1   | Interleukin 4 induced 1                                      | 16  | 191,143     | 194,187     | 3,045   |
| 33   | TLR4    | Toll-like receptor 4 precursor                               | 17  | 3,566,454   | 3,571,907   | 5,454   |
| 33   | BRINP1  | Bmp/retinoic acid inducible neural specific 1                | 17  | 3,985,882   | 4,064,290   | 78,409  |
| 33   | CD7     | T-cell antigen CD7                                           | 18  | 3,681,786   | 3,686,083   | 4,298   |
| 35   | TAGLN   | Transgelin                                                   | 24  | 5,229,236   | 5,232,028   | 2,793   |
| 36   | TREML2  | Triggering receptor expressed on myeloid cells isoform 1     | 26  | 4,693,285   | 4,699,278   | 5,994   |
| 37   | CD79B   | CD79b molecule                                               | 27  | 1,622,587   | 1,627,022   | 4,436   |

337



338 QTLR - ordinal number of the QTLR (Table 1); Chr - chromosome; Start/End - Galgal4 gene coordinates (bp);  
 339 Length - size of the gene (bp).  
 340

341 *Selection of candidate non-coding RNAs*

342 With many causal variants for quantitative traits known to reside within regulatory  
 343 elements [51], we deemed it important to examine non-coding transcripts as well. In contrast  
 344 to the candidate genes, these were selected more or less on the basis of position underlying  
 345 QTLR alone, with no information on potential biological function.

346 *Micro RNAs (miRNAs)*. A total of 46 miRNAs were found underlying the QTLR.  
 347 Sequence information was used to identify markers segregating in HL lines. For some  
 348 miRNAs, polymorphisms were not found, while for others multiple polymorphic sites were  
 349 observed. Since most of the miRNAs are very short, haplotype information could be derived  
 350 only for some of them. Ultimately, 17 miRNAs were chosen for further association analysis  
 351 (Table 3). Detection assays for 30 SNPs lying within these 17 transcripts were developed (S1  
 352 Table).

353 **Table 3. Candidate miRNAs in the QTLRs, by location (Galgal4).**

| QTLR | Gene Name    | Ensembl Gene ID    | Chr | Start       | End         | Length |
|------|--------------|--------------------|-----|-------------|-------------|--------|
| 5    | gga-mir-6553 | ENSGALG00000026406 | 1   | 76,381,420  | 76,381,519  | 100    |
| 7    | gga-mir-1738 | ENSGALG00000025522 | 1   | 104,085,133 | 104,085,223 | 91     |
| 12   | gga-mir-1749 | ENSGALG00000025364 | 2   | 569,326     | 569,423     | 98     |
| 12   | gga-mir-6710 | ENSGALG00000027384 | 2   | 724,388     | 724,497     | 110    |
| 18   | gga-mir-1462 | ENSGALG00000025207 | 4   | 8,488,386   | 8,488,495   | 110    |
| 25   | gga-mir-1659 | ENSGALG00000025154 | 7   | 13,177,026  | 13,177,126  | 101    |
| 25   | gga-mir-6624 | ENSGALG00000026751 | 7   | 15,758,919  | 15,759,028  | 110    |
| 25   | gga-mir-1570 | ENSGALG00000025238 | 7   | 16,274,218  | 16,274,317  | 100    |
| 26   | gga-mir-6660 | ENSGALG00000028738 | 10  | 1,076,742   | 1,076,851   | 110    |
| 30   | gga-mir-1644 | ENSGALG00000025220 | 14  | 8,124,516   | 8,124,601   | 86     |
| 31   | gga-mir-6643 | ENSGALG00000027935 | 14  | 13,143,450  | 13,143,559  | 110    |
| 31   | gga-mir-1588 | ENSGALG00000025419 | 14  | 14,125,510  | 14,125,611  | 102    |
| 31   | gga-mir-1715 | ENSGALG00000025576 | 14  | 14,285,835  | 14,285,936  | 102    |
| 35   | gga-mir-6612 | ENSGALG00000026265 | 24  | 4,779,927   | 4,780,036   | 110    |
| 35   | gga-mir-6671 | ENSGALG00000027111 | 24  | 5,035,783   | 5,035,892   | 110    |
| 35   | gga-mir-1745 | ENSGALG00000026550 | 24  | 5,163,387   | 5,163,473   | 87     |
| 37   | gga-mir-6573 | ENSGALG00000028331 | 27  | 1,532,553   | 1,532,671   | 119    |

354  
 355 QTLR - ordinal number of the QTLR (Table 1); Chr - chromosome; Start/End - miRNA bp coordinates, Length -  
 356 size of the miRNA (bp).



357

358 *Long non-coding RNAs (lncRNAs)*. With a view to testing some lncRNAs potentially  
 359 associated with MDV resistance, five small QTLR were chosen which harboured only a few  
 360 (1-6) lncRNAs. From these RNAs, up to 5 lncRNAs per QTLR were tested for association with  
 361 MD. Thus, there was relatively high likelihood that one of these would be the genomic element  
 362 housing the causative mutation. From among these, a further 17 transcripts were chosen for  
 363 further association analysis (**Table 4**). Two lncRNAs overlapped (labelled with negative  
 364 distance). Detection assays for 80 SNPs across these 17 transcripts were developed (**S1 Table**).

365 **Table 4. Candidate lncRNA in the QTLRs, by location (Galgal4).**

| QTLR | gene id; transcript id; stable transcript id | Chr | Start      | End        | Length  | Distance   | Strand | Exons |
|------|----------------------------------------------|-----|------------|------------|---------|------------|--------|-------|
| 1    | R192;R192.1;RI_1_8950428_8950983_1_1         | 1   | 8,950,428  | 8,950,983  | 556     |            | +      | 1     |
| 3    | R1291;R1291.1;RI_1_52122457_52122949_1_1     | 1   | 52,122,457 | 52,122,949 | 493     | 43,171,475 | -      | 1     |
| 3    | R1292;R1292.1;RI_1_52183105_52322961_6_1     | 1   | 52,183,105 | 52,322,961 | 139,857 | 60,157     | -      | 6     |
| 3    | R1293;R1293.2;RI_1_52481252_52482976_1_1     | 1   | 52,481,252 | 52,482,976 | 1,725   | 158,292    | -      | 1     |
| 3    | R1293;R1293.3;RI_1_52481282_52488508_2_1     | 1   | 52,481,282 | 52,488,508 | 7,227   | -1,693     | -      | 2     |
| 20   | R12773;R12773.1;RI_5_7604020_7604920_1_1     | 5   | 7,604,020  | 7,604,920  | 901     |            | +      | 1     |
| 20   | R12779;R12779.1;RI_5_7727117_7728010_1_1     | 5   | 7,727,117  | 7,728,010  | 894     | 122,198    | -      | 1     |
| 20   | R12784;R12784.1;RI_5_7960049_7961460_1_1     | 5   | 7,960,049  | 7,961,460  | 1,412   | 232,040    | +      | 1     |
| 21   | R13147;R13147.6;RI_5_18814123_18815319_2_1   | 5   | 18,814,123 | 18,815,319 | 1,197   | 10,852,664 | +      | 2     |
| 21   | R13148;R13148.1;RI_5_18861679_18862530_1_1   | 5   | 18,861,679 | 18,862,530 | 852     | 46,361     | +      | 1     |
| 21   | R13149;R13149.1;RI_5_19632618_19793846_5_1   | 5   | 19,632,618 | 19,793,846 | 161,229 | 770,089    | -      | 5     |
| 24   | R15316;R15316.1;RI_6_31138889_31157672_3_1   | 6   | 31,138,889 | 31,157,672 | 18,784  |            | -      | 3     |
| 24   | R15317;R15317.1;RI_6_31199730_31200561_1_1   | 6   | 31,199,730 | 31,200,561 | 832     | 42,059     | -      | 1     |
| 24   | R15318;R15318.1;RI_6_31204510_31210163_7_1   | 6   | 31,204,510 | 31,210,163 | 5,654   | 3,950      | +      | 7     |
| 24   | R15319;R15319.1;RI_6_31263768_31264516_1_1   | 6   | 31,263,768 | 31,264,516 | 749     | 53,606     | +      | 1     |
| 24   | R15320;R15320.2;RI_6_31277294_31279639_1_1   | 6   | 31,277,294 | 31,279,639 | 2,346   | 12,779     | -      | 1     |
| 24   | R15321;R15321.1;RI_6_31368941_31369400_1_1   | 6   | 31,368,941 | 31,369,400 | 460     | 89,303     | -      | 1     |

366

367 QTLR - ordinal number of the QTLR (Table 1); gene id; transcript id; stable transcript id – unique lncRNA  
 368 identifier; Chr - chromosome; Start/End - lncRNA bp coordinates; Length - size of the lncRNA (bp); Distance -  
 369 bp between lncRNAs on the same chromosome; negative labelled value - overlap between this lncRNA and the  
 370 previous one. Data from [43].

371

### 372 *Selection of potentially functional variants in coding genes*

373 Analysis of the complete sequences of the 10 F<sub>0</sub> birds showed multiple SNPs  
 374 distinguishing the founder birds that could impact gene function. Alternative variants fixed in  
 375 one parental line compared to the other and which were predicted to cause highly deleterious  
 376 changes in the gene protein product, were chosen as candidates for further study. Across the  
 377 genome as a whole, a total of 252 variants of this nature were identified in 217 genes, with 22

378 of these variants lying within genes underlying the 38 QTLR. Twelve of these variants  
 379 (representing 9 genes) were segregating in one or more of the 8 elite lines and were chosen for  
 380 further studies in these lines. These 12 SNPs are summarized in **Table 5**. Specific details on  
 381 the detection assays are provided in **S1 Table**.

382 **Table 5. Markers in the QTLRs with genetic variations predicted to be functionally deleterious to the gene**  
 383 **product.**

| QTLR | Gene               | Marker | Chr | bp          | Consequence    | Effect               |
|------|--------------------|--------|-----|-------------|----------------|----------------------|
| 14   | ENSGALG00000015219 | MD-07  | 2   | 107,385,545 | S/*            | Stop gained          |
| 25   | gga-mir-7474       | MD-16  | 7   | 14,743,048  | actgat         | Frame shift          |
| 26   | ENSGALG00000001269 | MD-20  | 10  | 48,846      | P/X            | Frame shift          |
| 29   | ENSGALG00000004078 | MD-23  | 13  | 11,619,922  | gtt/gGTTTt     | Frame shift          |
| 30   | IGSF6              | MD-28  | 14  | 8,738,347   | L/X            | Frame shift          |
| 32   | BG1                | MD-29  | 16  | 117,493     |                | Splice site acceptor |
| 32   | BG1                | MD-30  | 16  | 118,808     | Q/*            | Stop gained          |
| 32   | ENSGALG00000028367 | MD-32  | 16  | 206,100     |                | Splice site acceptor |
| 32   | ENSGALG00000028367 | MD-33  | 16  | 206,241     |                | Splice site acceptor |
| 36   | ENSGALG00000003188 | MD-44  | 26  | 4,629,538   | *C             | Stop lost            |
| 37   | SCN4A              | MD-45  | 27  | 1,646,318   | aga/agaCAGAAAT | Frame shift          |
| 37   | SCN4A              | MD-46  | 27  | 1,646,601   | Q/*            | Stop gained          |

384  
 385 QTLR - ordinal number of the QTLR (Table 1); Chr - chromosome; bp - Galgal4 location of deleterious variant;  
 386 AA change - amino acid change.  
 387

388 *Selecting QTLR markers from the candidate genomic elements, for genotyping in the 8 elite*  
 389 *HL pure lines*

390 Markers located in the genomic elements underlying the QTLR (genes, miRNAs,  
 391 lncRNAs, and singleton variants with potentially functional effects), were identified from  
 392 genome sequences aligned to the reference chicken genome for each of the lines utilized in this  
 393 study. For the candidate genes underlying the QTLR, SNPs predicted to alter amino acids were  
 394 preferentially chosen. For all genomic elements (not including the singleton functional  
 395 mutations), variants were also selected to encompass the entire gene when possible, so as to  
 396 define haplotype status of each bird for subsequent association tests. All SNPs selected were  
 397 validated using the same approach as defined above

398

## 399 **Genotyping of the eight elite lines**

400 Genomic DNA was extracted from whole blood using salt/ethanol precipitation and  
401 stored at -20°C until use. DNA was diluted to 25 ng/ul. Genotyping was done as single-plex  
402 assays on the SNPLine system (LGC, UK). All assays used KASP chemistry, which is a  
403 fluorescent-based competitive allele-specific detection method [52]. Genotyping was done in  
404 1,536 well plates, and results analysed with Kraken software (LGC, Hoddesdon, UK) as  
405 previously described [53]. Specific details on primers for each assay are provided in **S1 Table**.

406

## 407 **QTLR association analysis**

408 Association of markers and marker-haplotypes with sires progeny-tested for post-  
409 challenge survival in the 8 HL elite lines was tested using JMP Genomics SNP-Trait  
410 association Trend test (JMP Genomics, Version 9, SAS Institute Inc., Cary, NC, 1989-201).  
411 When analysing a line-marker combination, the generation and MHC background were taken  
412 as class variables and fixed effects, and when analysing a marker combining all lines together,  
413 the line was added to the fixed effects. To obtain experimental significance thresholds, the  
414 Proportion of False Positives (PFP) [39,40] was used to correct for multiple tests.

415

## 416 **Results**

### 417 **High resolution MD QTL mapping in Advanced Full-Sib inter-cross F<sub>6</sub> families**

418 Following genotyping of the F<sub>6</sub> families by the Affymetrix 600K HD SNP chip, 40-43%  
419 of SNPs (depending on family) were found to be informative and passed QC (total, 238,777 to  
420 259,098 informative SNPs per family; average of 246,400 SNPs in a family). The distribution  
421 of the marker P-values was fairly uniform over the range of allele frequencies. A clear excess

422 of small P-values (an indication of presence of true QTL effects) was not seen. In accordance  
423 with this, only in families 2, 4 and 5, were markers significant at  $PFP \leq 0.2$ . However,  $n_1$  - the  
424 estimated number of falsified null hypotheses at  $PFP \leq 0.2$  [39,40], ranged from 1,718 in  
425 Family 1 (0.7% of all markers tested in the family) to 17,385 in Family 2 (6.7% of markers  
426 tested), indicating the actual presence of true QTL effects.

427 As described in Methods, many markers were nominally significant, and distinct clusters  
428 of nominally significant markers intermixed with non-significant markers were clearly seen.  
429 Hence, to identify QTL we used a moving average of marker  $-\text{Log}_{10}P$  values (mAvg) across a  
430 window size of 0.1 Mb (27 SNPs) to smooth the plots. Examining Manhattan plots (**Figure 1**  
431 and **S1 Figure**), showed that the smoothing did yield a good monotonic plot, allowing  
432 identification of QTL and the use of the drop method [42] to define their boundaries.

433 Using a threshold of  $\text{mAvg} \geq 2.0$  and QTLR boundaries defined by Log Drop 1, a total  
434 of 57 regions meeting our criteria for significance were identified, ranging from 4 to 16 in a  
435 family. In some families, several regions clustered within 1 Mb of one another. Nine such  
436 chromosome-by-family clusters were identified, containing 2-4 significant sub-regions per  
437 cluster. Conservatively, we counted each cluster as representing a single within-family QTLR.  
438 Similarly, aligning QTLR maps of the five families, showed that 6 significant regions  
439 overlapped or were within 1 Mb of one another across two families. Here too, counting the  
440 same QTLR across different families only once, resulted in a final total of 38 QTLR being  
441 identified (**Table 1**). These 38 QTLR were the focus of further examination of variants as  
442 defined by multiple methodologies employed below.

443

#### 444 **Annotation of QTLR**

445 Transcripts of genes located under the 38 mapped QTLR were identified by using the

446 Biomart tool within the Ensembl database (v79) (**S2 Table**). The number of known annotated  
447 genes in each QTLR ranged from 0 to 86, for a total of 1,072 genes. Using the annotation  
448 developed and described by [53], which was based on characterisation of full-length transcripts  
449 using long-read sequencing and a bioinformatics pipeline to define coding and non-coding  
450 RNAs, we identified 1 to 99 lncRNAs within each defined QTLR, with a total 1,153 lncRNAs  
451 (**Table 1**).

452

### 453 **Identification and Analysis of SNPs in F<sub>0</sub> parental birds**

454 To investigate variants residing in regions of the genome potentially associated with  
455 MDV resistance, the 10 founder parents that gave rise to the F<sub>6</sub> population used in this study  
456 were sequenced and variants determined between males and females. Combined across both  
457 lines 8,273,112 SNPs were identified. Examining the 38 QTLR within the genome highlighted  
458 133,394 SNPs in these regions, which were fixed for alternative SNP variants with one parental  
459 line compared to the other (**S3 Table**). With a view to testing for causality, any of these variants  
460 could then be tested for genetic association with the progeny-test for survival in the 8 elite HL  
461 lines.

462

### 463 **Transcriptomic analysis of male and female commercial birds challenged with MDV**

464 Based on the observation noted above, that male and female birds tend to show  
465 differential resistance, we examined the expression profiles of five male and five female W36  
466 birds challenged with vv<sup>+</sup>MDV, and 5 male and 5 female W36 non-challenged control birds  
467 (see Methods). Gene expression results from this transcriptomic analysis are presented in **S4**  
468 **Table**.

469 First, we compared gene expression in challenged and control chicks within each sex of

470 W36 birds; 185 genes (58 up- and 127 down-regulated) were differentially expressed in male  
471 chicks, while there were 114 genes (62 up- and 52 down-regulated) differentially expressed  
472 upon challenge of the female birds. When these genes are compared across sex, the individual  
473 responses are seen to be quite different, with minimal overlap of DEGs between the male and  
474 female groups (**Figure 2**).

475 When the different responses were compared, it is seen that biological pathways  
476 predominantly involved in the host response in female chicks include activation of cancer  
477 signalling, whereas the DEGs identified in the male birds have roles in the Th1 immune  
478 response and dendritic cell maturation amongst others (**Figure 3A**). The diseases and  
479 biofunctions associated with the genes involved in each response are depicted in **Figure 3B**.  
480 Strikingly, with MD being an oncogenic disease, functions related to cancer and tumorigenesis  
481 are seen to be up-regulated in female birds, but are repressed in the male chicks. Investigation  
482 of genes acting as upstream regulators of identified DEGs again indicates differential  
483 regulatory mechanisms in each sex. *TGFB* appears to be a key regulator of mechanisms in  
484 females, whereas *STAT1* (an interferon response gene) is suggested to have a more prominent  
485 role in the males (**Figure 3C**).

486 Examination of the unchallenged control birds from each group (male and female W36  
487 birds) identified 302 genes which were expressed in an inherently different manner between  
488 the sexes. So, these DEGs, being independent of MD challenge, are due to gender differences  
489 and/or intrinsic immune differences, manifesting in differing resistance to infection. Significant  
490 DEGs include the obvious immune related genes but also various serine proteases and  
491 carboxypeptidases, which may suggest a role in resistance to MDV. Genes previously  
492 implicated in MDV resistance including MHC genes, *IRGI* [18] and *SCYCI* [16], were also  
493 highlighted.

494

## 495 **Analysis of differentially expressed genes located in QTLR**

496 When DEGs are located within QTLR affecting MD resistance, it is plausible that these  
497 genes may be the causative quantitative trait gene (QTG) responsible for the QTLR effect.  
498 Based on this hypothesis, the list of genes located in the 38 QTLR identified in this study was  
499 compared to the list of DEGs. Genes that were both expressed under challenge and that were  
500 also located under one of the 38 mapped QTL, were considered likely candidate QTG (**S5**  
501 **Table**).

502 To determine if any particular types of genes were represented by the DEGs underlying  
503 significant genomic regions (identified either from this or previous studies [31,33,54-56]), the  
504 gene ontologies associated with these DEGs were studied. **S6 Table** shows that  
505 immunoglobulins, stimulus response genes and genes involved in regulating the immune  
506 response are all highly represented. Analysis of the biological pathways controlled by these  
507 genes was also examined. To look for possible common pathways, network analysis was  
508 performed. Three networks stood out significantly: cell movement, cell signalling and cancer  
509 (**Figure 4A**); cell signalling and nervous system development (**Figure 4B**) and antimicrobial  
510 resistance, inflammation and cell death (**Figure 4C**). When candidate upstream regulators of  
511 these genes were investigated, the cytokines *TNF*, *EDN1*, *IL1B* and *IFNG* were all indicated as  
512 potentially regulating many of the genes under study. Interestingly, the *TNF* gene is located in  
513 QTLR 18 on Chr 4, 387,071 bp downstream of the top window in this QTLR.

514

## 515 **Validating QTLR for association with MDV resistance**

### 516 *Populations, genomic elements and markers*

517 In a unique aspect of this study, QTLR identified in the F<sub>6</sub> mapping population were re-  
518 tested for association with MD resistance in 8 pure lines maintained under selection for

519 multiple commercial production traits at HL. Markers for QTLR validation were chosen from  
520 among the various classes of genomic elements identified underlying the QTLR, namely genes,  
521 miRNAs and lncRNAs. Also included were a group of singleton coding SNPs predicted to have  
522 deleterious effects on protein structure and function (the functional mutations).

### 523 *Genetic association tests*

524 When possible, a number of markers were genotyped in each candidate gene, so that  
525 association could be based on marker haplotypes rather than individual markers. When this is  
526 done, all of the information is in the ‘Haplotypes’. The individual markers are usually in  
527 complete LD and hence do not add anything to the analysis. Thus, for statistical analyses what  
528 is important are the number of element x line tests, rather than number of marker x line tests.  
529 We counted an element x line test as significant if the haplotype was significant, or if one or  
530 more markers in the element was significant.

531 A total of 355 markers located in 66 genetic elements (genes, miRNA, lncRNA, and  
532 functional mutations) underlying 26 of the 38 QTLR were tested for association with MD  
533 mortality in the 8 elite lines (**S7 Table**). In 46 of the elements, multi-marker haplotypes were  
534 also tested. The association tests were carried out separately within each of the 8 elite lines,  
535 and also in data combined across the 8 lines, yielding 2,032 P-values. A total of 387 element  
536 by line tests were performed.

537

538 **Significance of individual candidate genes.** Twenty genes located in the QTLR were tested  
539 by a total of 127 gene x line tests of markers encompassing the entire gene, A test was  
540 considered significant if the haplotype x line test was significant, or if any one of the markers  
541 encompassing the haplotype were significant. All but *IL411*, *TAGLN* and *CD79B* (in QTLR 32,  
542 35 and 37), were significant in two or more marker x line tests. Thus, 17 genes may be taken



543 as strong candidates to be a QTG (**S8 Table**).

544 **Association of markers located in miRNA.** A total of 17 miRNAs were chosen (**Table 3**),  
545 and 28 markers tested for association (**S7 Table**) for a total of 96 element x line tests. Only 5  
546 significant to highly significant P-values were obtained. (**S8 Table**).

547 **Significance of individual miRNAs.** Significant results were found in only 5 out of the 17  
548 miRNA tested. Most interesting was gg-mir-6553 with the highest proportion of significant  
549 tests among the miRNAs (**S8 Table**). This miRNA is located in QTLR 5, along with 3  
550 significant genes (*CSTA*, *LAG3*, and *CIS*). The results indicate two putative causative  
551 quantitative elements in this QTLR: one upstream in the region of *CSTA*, the other downstream  
552 in the region of *LAG3* and *CIS*.

553 **Associations of markers located in lncRNAs.** A total 17 lncRNAs were chosen (**Table 4**),  
554 and 80 markers were tested for association (**S7 Table**) in a total of 114 element x line tests, of  
555 which 9 were significant (**S8 Table**).

556 **Significance of individual lncRNAs.** Significant results were found with 9 of the 17 lncRNAs  
557 tested (**S8 Table**). QTLR worth mentioning are 20 and 21 on Chr5, both tested by lncRNAs  
558 only, are detailed in **S1 File**.

559 **Associations of QTLR functional mutations in coding genes.** Twelve potentially functional  
560 mutations were tested in a total of 50 element x line tests, of which 6 were significant (**Table**  
561 **5**).

562 **Significance of genes harbouring potentially functional mutations.** Significant results were  
563 found in 5 of the 9 QTLR genes harbouring potentially functional mutations. In Line WPR1,  
564 the 2 markers in the gene *BGI* (markers MD-29 and MD-30 in QTLR 32 on Chr 16) had  
565 practically the same P values as the markers of the candidate gene *TAPI* (**S8 Table**), thus  
566 strengthening the results of that gene. It should be noted that *BGI* and *TAPI* lie within the

567 chicken MHC, as noted above, a locus known to impact MDV resistance.

568 *Summary of element x line tests*

569 **S9 Table** summarises the element x line tests by type of element. Tests of the coding genes are  
570 outstanding in the high proportion of significant element x line tests; more than double that of  
571 the other genomic elements. Since the candidate genes were chosen on the basis of much more  
572 information than the other classes of elements, the high proportion of significant tests can be  
573 taken to support the proposition that the process by which the candidate genes were selected  
574 was effective and that an appreciable fraction of the chosen candidate genes are the actual  
575 Quantitative Trait Genes. This must be qualified however, as the distribution of the different  
576 classes of genomic elements among the QTLRs was not random, and thus may be biasing the  
577 results.

578

### 579 **Validation of QTLR**

580 A total of 26 QTLR were tested for significance of element x line tests. Of these, eight did not  
581 have any significant element x line tests, 5 had one significant test and 14 had 2 to 6 significant  
582 element x line tests. Thus, 18 QTLR can be considered as validated. Of the unconfirmed  
583 QTLR, QTLRs 1, 3 and 24 were tested by lncRNAs only, QTLRs 12 and 18 by miRNAs only,  
584 QTLR 14 by functional mutations only, and QTLR 25 by both miRNA and functional  
585 mutations. More markers need to be tested in these QTLR to decide if the lack of significance  
586 is a result of lack of informativity (Type 2 error), or if indeed these QTLR are false positives  
587 (Type I error). More detail on the association found within each individual QTLR is presented  
588 in **S1 File**.

589

### 590 **DISCUSSION**

591 QTL mapping in an FSIL F<sub>6</sub> population phenotyped for survival in the face of MDV  
592 challenge, identified 38 QTLR distributed over 19 autosomes. Use of such a resource allowed  
593 for the identification of QTLR at a higher resolution than have been mapped previously, thus  
594 allowing for easier identification of potential candidate genes. The mapped QTLR, along with  
595 genomic sequences of the F<sub>0</sub> founder individuals, and transcriptomic information from  
596 challenged and control birds, has allowed us to identify genes, miRNAs, lncRNAs and  
597 potentially functional mutations located under these QTLR as candidates for association with  
598 progeny mortality from Marek's Disease. Genetic association studies in multiple elite lines  
599 have confirmed the significant effects of most of these candidates on MD. Here we will discuss  
600 the potential role of some of the most significant candidates.

601 Many of the genes we have associated with MD response in this study have biological  
602 roles clearly relevant to the pathogenesis of MDV infection. One of the primary targets of the  
603 virus are B-cells and genes known to be associated with B-cells, include two of our candidates  
604 - *CD7*, the T-cell leukaemia antigen which is involved in T-cell/B-cell interactions and the  
605 Toll-like receptor, *TLR4* which is found on the surface of B-lymphocytes.

606 After initial infection and a period of latency, T-cells become infected. Genes related to  
607 T-cell signalling pathways include our MD-associated *ADAMTS5*, *CD7*, *HAVCR1*, *LAG3*,  
608 *RELT*, *TIMD4* and *TREML2*. *ADAMTS5* (ADAM Metalloproteinase With Thrombospondin  
609 Type 1 Motif 5) encodes a metalloproteinase that plays an important role in inflammation and  
610 cell migration. It also has a critical role in T-lymphocyte migration from draining lymph nodes  
611 following viral infection. *HAVCR1* - Hepatitis A Virus Cellular Receptor 1 (T-Cell  
612 Immunoglobulin Mucin Receptor 1) is a receptor for TIMD4. *HAVCR1* plays a critical role in  
613 regulating immune cell activity, particularly regarding the host response to viral infection,  
614 while *TIMD4* is a T-cell immunoglobulin involved in regulating T-cell proliferation and  
615 lymphotoxin signalling. *LAG3* (Lymphocyte-Activation Gene 3) belongs to the

616 immunoglobulin superfamily and acts as an inhibitory receptor on activated T-cells. It  
617 negatively regulates the activation, proliferation and effector function of both CD8<sup>+</sup> and CD4<sup>+</sup>  
618 T-cells as well as mediating immune tolerance. RELT is a member of the TNF-receptor  
619 superfamily. It can activate the NF-kappaB pathway and selectively bind TNF receptor-  
620 associated factor 1 (TRAF1). This receptor acts via CD3 signalling to stimulate T-cell  
621 proliferation, suggesting its regulatory role in the immune response. TREML2 (Triggering  
622 Receptor Expressed On Myeloid Cells Like 2) is a cell surface receptor that may play a role in  
623 both the innate and adaptive immune responses. It acts as a counter-receptor for CD276, with  
624 interaction with CD276 on T-cells enhancing T-cell activation.

625         Once infection of T-cells has occurred, the disease can then proceed to become  
626 oncogenic. Once again, we see that many of our MD associated genes have functions that have  
627 been implicated in cancer, including *BGI* which encodes an Ig-superfamily type I  
628 transmembrane receptor-like protein that contains an immuno-receptor tyrosine-based  
629 inhibition motif (ITIM). *BGI* has previously been documented as conferring MHC-associated  
630 resistance to MDV-induced lymphoma [57]. Other candidates include *BRINP1* (silenced in  
631 some bladder cancers), *CD7* (associated with leukaemia), *CSTA* (encodes a stefin that functions  
632 as a cysteine protease inhibitor, suggested as a prognostic tool for cancer), *FLT3* (mutations in  
633 this gene are common in acute myeloid leukaemia), and *SUPT20H* (a known tumour rejection  
634 antigen).

635         One of the main pathologies of MD is its effect on the nervous system, and so it is  
636 interesting to see that some of our MD associated genes are involved in the function/growth of  
637 neurons (*SCN4A* and *CTNNA2*). *SCN4A* (Sodium Voltage-Gated Channel Alpha Subunit 4)  
638 encodes one member of the sodium channel alpha subunit gene family involved in generation  
639 and propagation of action potentials in neurons and muscle. *CTNNA2* (Catenin Alpha 2) is  
640 thought to be involved in regulation of cell-cell adhesion and differentiation in the nervous

641 system. It is required for proper regulation of cortical neuronal migration and neurite growth.

642 The remaining MD associated genes are seen to have general roles as immune system  
643 genes: *CIS*, *TAP1* and *SOCS1*. *CIS* (Complement component 1S) encodes a serine protease  
644 component of the complement system which enhances the host antibody immune response.  
645 *TAP1* (Transporter 1, ATP Binding Cassette Subfamily B Member) is involved in the transport  
646 of antigens from the cytoplasm to the endoplasmic reticulum for association with MHC class I  
647 molecules. *SOCS1* (Suppressor of Cytokine Signalling 1) encodes a protein which functions  
648 downstream of cytokine receptors, and takes part in a negative feedback loop to attenuate  
649 cytokine signalling. All of these candidate genes had more than one test significant at  $P \leq 0.05$ .

650 Examination of these genes and their significance of association with MDV resistance  
651 across the elite lines indicates a few top candidates, namely: the cluster of genes in QTLR5  
652 (*CSTA*, *CIS* and *LAG3*), *FLT3* in QTLR10, *CTNNA2* in QTLR19 and *TAP1* in QTLR32.

653 Genes identified in this analysis include many novel candidates for resistance as well as  
654 highlighting genes proposed in previous studies. For example *CD8B* (T-cell glycoprotein),  
655 *CTLA4* (immunoglobulin) and *CD72* (B-cell associated) are postulated as important lncRNA  
656 target genes by You et al. [24] and are found under our QTLRs (*CD8B* - QTLR19), and  
657 differentially expressed in our transcriptomic work (*CTLA4* and *CD72*). Similarly, *ATF2*  
658 (involved in carcinogenesis is found in QTLR25) was proposed as an important target for the  
659 miRNA gga-mir15b during MDV infection [25]. Also in QTLR25 we find gga-mir-10b,  
660 previously seen to be upregulated in the spleen during MDV infection [27]. Other potentially  
661 interesting miRNA targets include *PBEF1* (pre-B-cell enhancing factor) and *FCHSD2*  
662 (involved in endocytosis) [26] that lie under QTLR2 and 11, respectively. Further genes  
663 previously linked with MDV resistance include *GHI* (growth hormone) and *CD79B* (B-cell  
664 antigen), both of which lie under our QTLR37.

665 One of the significant aspects of this research is that it utilized large, commercial  
666 production- relevant lines, and the challenge virus is a very virulent ++ strain, frequently  
667 encountered by production birds in the field. In contrast, most previously published MDV  
668 resistance research utilizes specialized research lines, many of which are inbred, and selected  
669 for differential response to MDV. These studies utilized laboratory strains of the virus, for  
670 which commercial production birds now appear to be resistant. Furthermore, this study  
671 investigated MD resistance genes in three distinct breeds of chickens, White Leghorn, White  
672 Plymouth Rock and Rhode Island Red, not just one laboratory line. Moreover, these MD  
673 association studies replicated the results from the FSIL study increasing our confidence in the  
674 causal nature of the QTLR, and possibly the genes and variants in MDV resistance. The  
675 response to the virus was measured as mortality in a large progeny group (approximately 30  
676 daughters) for over 9,000 sires, using pre-existing information that had been developed within  
677 a commercially relevant production trait breeding program. This unique approach increases  
678 the relevance of the results to application into a commercial breeding program, while  
679 simultaneously provides information on the underlying mechanism of general viral resistance  
680 applicable to not only birds, but also other species. This information can provide insights into  
681 mechanisms for improving resistance or lead to the development of improved commercial  
682 vaccines.

683

## 684 **CONCLUSIONS**

685 Utilizing an FSIL F<sub>6</sub> population of birds phenotyped for response to Marek's Disease  
686 Virus infection has allowed us to map QTLR for disease resistance at high-resolution.  
687 Combining this with expression data from challenged and control birds, we have identified  
688 candidate genes, miRNAs, lncRNAs and potentially functional mutations which have been  
689 validated in genetic association tests with MD mortality in diverse, elite lines of poultry. This

690 most comprehensive genetic study to date supplies us with variants in candidate genes that can  
691 now go on to be functionally tested for their utility in marker assisted selection, improved  
692 vaccine development and potential future gene editing strategies.

693

## 694 **LIST OF ABBREVIATIONS**

695 DEG – differentially expressed gene

696 FSIL – full-sib inter-cross line

697 GWAS – genome wide association study

698 HAPS - haplotypes

699 HL - Hy-Line

700 HVT – herpesvirus of turkeys

701 mAvg - moving average of -LogP of a marker association test

702 MD – Marek’s Disease

703 MDV – Marek’s Disease Virus

704 MHC – major histocompatibility complex

705 PCR – polymerase chain reaction

706 PFU – plaque forming units

707 QC – quality control

708 QT - quantitative trait

709 QTG – quantitative trait gene

710 QTL – quantitative trait locus

711 QTLR - QTL region

712 SB1 – non-oncogenic MD virus

713 vv+ - very virulent plus

714 SNP – single nucleotide polymorphism

715

## 716 **ETHICS APPROVAL**

717 All procedures carried out on the birds involved in this study were conducted in compliance  
718 with Hy-Line International Institutional Animal Care and Use Committee guidelines.

719

## 720 **AVAILABILITY OF DATA**

721 Data have been submitted to the European Nucleotide Archive (ENA) at EMBL-EBI under  
722 study accession numbers PRJEB39142 (WGS) and PRJEB39361 (RNAseq).

723

## 724 **COMPETING INTERESTS**

725 The authors declare no conflicts of interest and no competing financial interests.

726

## 727 **FUNDING**

728 This work was supported by the Biotechnology and Biological Sciences Research Council  
729 (grant number BB/K006916/1).

730

## 731 **AUTHOR CONTRIBUTIONS**

732 JS carried out whole genome sequence, variant and RNAseq analyses, downstream biological  
733 analyses and wrote the manuscript; EL and MS performed all association analyses; JF provided



734 all experimental animals, DNA samples and individual genotypes; DB conceived and managed  
735 the project. All authors contributed to the interpretation of the results and edited and approved  
736 the final manuscript.

737

## 738 **ACKNOWLEDGEMENTS**

739 The authors would like to thank Choon-Kiat Khoo, Richard Kuo and Lel Eory (Roslin) for  
740 invaluable bioinformatics assistance. Also requiring thanks are Ashlee R. Lund, Amy M.  
741 McCarron, Kara Pinegar-Maxon and Grant Liebe (Hy-line) for their excellent technical  
742 assistance with genotyping. We are also extremely grateful to Edinburgh Genomics  
743 (Edinburgh, UK) for carrying out the 600K SNP genotyping and the whole genome sequencing  
744 of the parental birds. We would also like to thank the GATC sequencing facility (Konstanz,  
745 Germany) for generating the transcriptomic data used in this study.

746

## 747 **REFERENCES**

- 748 1. Morrow C, and Fehler F. 2004. Marek's disease: a worldwide problem In: Davison F and  
749 Nair V, editors. Marek's Disease, An Evolving Problem. Elsevier Ltd., Oxford, UK pp.  
750 49–61.
- 751 2. Nair V. Evolution of Marek's disease -- a paradigm for incessant race between the pathogen  
752 and the host. *Vet J.* 2005;170(2):175-183. doi:10.1016/j.tvjl.2004.05.009
- 753 3. Islam AF, Wong CW, Walkden-Brown SW, Colditz IG, Arzey KE, Groves PJ.  
754 Immunosuppressive effects of Marek's disease virus (MDV) and herpesvirus of turkeys  
755 (HVT) in broiler chickens and the protective effect of HVT vaccination against MDV  
756 challenge. *Avian Pathol.* 2002;31(5):449-461. doi:10.1080/0307945021000005824

- 757 4. Witter RL. Protective efficacy of Marek's disease vaccines. *Curr Top Microbiol Immunol.*  
758 2001;255:57-90. doi:10.1007/978-3-642-56863-3\_3
- 759 5. Read AF, Baigent SJ, Powers C, Kgosana LB, Blackwell L, Smith LP, Kennedy DA,  
760 Walkden-Brown SW, Nair VK. Imperfect Vaccination Can Enhance the Transmission of  
761 Highly Virulent Pathogens. *PLoS Biol.* 2015;13(7):e1002198.  
762 doi:10.1371/journal.pbio.1002198
- 763 6. Boodhoo N, Gurung A, Sharif S, Behboudi S. Marek's disease in chickens: a review with  
764 focus on immunology. *Vet Res.* 2016;47(1):119. doi:10.1186/s13567-016-0404-3
- 765 7. Fulton JE, Arango J, Arthur JA, Settar P, Kreager KS, O'Sullivan NP. Improving the  
766 outcome of a Marek's disease challenge in multiple lines of egg type chickens. *Avian*  
767 *Dis.* 2013;57(2 Suppl):519-522. doi:10.1637/10408-100212-Reg.1
- 768 8. Wolc A, Arango J, Jankowski T, Settar P, Fulton JE, O'Sullivan NP, Fernando R, Garrick  
769 DJ, Dekkers JC. 2013. Genome-wide association study for Marek's disease mortality in  
770 layer chickens. *Avian Dis.* 2013;57(2 Suppl):395-400. doi:10.1637/10409-100312-Reg.1
- 771 9. Burgess SC, Young JR Baaten BJ, Hunt L, Ross LN, Parcels MS, Kumar PM, Tregaskes  
772 CA, Lee LF, Davison TF. Marek's disease is a natural model for lymphomas  
773 overexpressing Hodgkin's disease antigen (CD30). *Proc Natl Acad Sci U S A.*  
774 2004;101(38):13879-13884. doi:10.1073/pnas.0305789101
- 775 10. Li K, Lian L, Yang N, Qu L. Temporal expression and DNA hypomethylation profile of  
776 CD30 in Marek's disease virus-infected chicken spleens. *Poult Sci.* 2015;94(6):1165-1169.  
777 doi:10.3382/ps/pev100
- 778 11. Bacon LD, Witter RL, Crittenden LB, Fadly A, Motta J. B-haplotype influence on Marek's  
779 disease, Rous sarcoma, and lymphoid leukosis virus-induced tumors in chickens. *Poult*  
780 *Sci.* 1981;60(6):1132-1139. doi:10.3382/ps.0601132

- 781 12. Kaufman J. The simple chicken major histocompatibility complex: life and death in the  
782 face of pathogens and vaccines. *Philos Trans R Soc Lond B Biol Sci.*  
783 2000;355(1400):1077-1084. doi:10.1098/rstb.2000.0645
- 784 13. Koch M, Camp S, Collen T, Avila D, Salomonsen J, Wallny H-J, van Hateren A, Hunt  
785 L, Jacob JP, Johnston F, Marston DA, Shaw I, Dunbar PR, Cerundolo V, Jones  
786 EY, Kaufman J. Structures of an MHC class I molecule from B21 chickens illustrate  
787 promiscuous peptide binding. *Immunity.* 2007;27(6):885-899.  
788 doi:10.1016/j.immuni.2007.11.007
- 789 14. Hunt HD, Jadhao S, Swayne DE. Major histocompatibility complex and background genes  
790 in chickens influence susceptibility to high pathogenicity avian influenza virus. *Avian Dis.*  
791 2010;54(1 Suppl):572-575. doi:10.1637/8888-042409-ResNote.1
- 792 15. Liu HC, Kung HJ, Fulton JE, Morgan RW, Cheng HH. Growth hormone interacts with the  
793 Marek's disease virus SORF2 protein and is associated with disease resistance in  
794 chicken. *Proc Natl Acad Sci USA.* 2001;98(16):9203-9208. doi:10.1073/pnas.161466898
- 795 16. Liu HC, Cheng HH, Tirunagaru V, Sofer L, Burnside J. A strategy to identify positional  
796 candidate genes conferring Marek's disease resistance by integrating DNA microarrays  
797 and genetic mapping. *Anim Genet.* 2001;32(6):351-359. doi:10.1046/j.1365-  
798 2052.2001.00798.x
- 799 17. Liu HC, Niikura M, Fulton JE, Cheng HH. Identification of chicken lymphocyte antigen 6  
800 complex, locus E (LY6E, alias SCA2) as a putative Marek's disease resistance gene via a  
801 virus-host protein interaction screen. *Cytogenet Genome Res.* 2003;102(1-4):304-308.  
802 doi:10.1159/000075767
- 803 18. Smith J, Sadeyen JR, Paton IR, Hocking PM, Salmon N, Fife M, Nair V, Burt DW, Kaiser  
804 P. Systems analysis of immune responses in Marek's disease virus-infected chickens

- 805 identifies a gene involved in susceptibility and highlights a possible novel pathogenicity  
806 mechanism. *J Virol.* 2011;85(21):11146-11158. doi:10.1128/JVI.05499-11
- 807 19. Meydan H, Yildiz MA, Dodgson JB, Cheng HH. Allele-specific expression analysis reveals  
808 CD79B has a cis-acting regulatory element that responds to Marek's disease virus infection  
809 in chickens. *Poult Sci.* 2011;90(6):1206-1211. doi:10.3382/ps.2010-01295
- 810 20. Li DF, Lian L, Qu LJ, Chen YM, Liu WB, Chen SR, Zheng JX, Xu GY, Yang N. A genome-  
811 wide SNP scan reveals two loci associated with the chicken resistance to Marek's disease.  
812 *Anim Genet.* 2013;44(2):217-222. doi:10.1111/j.1365-2052.2012.02395.x
- 813 21. Wang D, Sun S, Heidari M. Marek's disease vaccine activates chicken macrophages. *J Vet*  
814 *Sci.* 2018;19(3):375-383. doi:10.4142/jvs.2018.19.3.375
- 815 22. Chakraborty P, Kuo R, Vervelde L, Dutia BM, Kaiser P, Smith J. Macrophages from  
816 Susceptible and Resistant Chicken Lines have Different Transcriptomes following  
817 Marek's Disease Virus Infection. *Genes (Basel).* 2019;10(2):74.  
818 doi:10.3390/genes10020074
- 819 23. Han B, He Y, Zhang, L, Ding Y, Lian L, Zhao C, Song J, Yang N. Long intergenic non-  
820 coding RNA GALMD3 in chicken Marek's disease. *Sci Rep.* 2017;7(1):10294.  
821 doi:10.1038/s41598-017-10900-2
- 822 24. You Z, Zhang Q, Liu C, Song J, Yang N, Lian L. Integrated analysis of lncRNA and mRNA  
823 repertoires in Marek's disease infected spleens identifies genes relevant to resistance. *BMC*  
824 *Genomics.* 2019;20(1):245. doi:10.1186/s12864-019-5625-1
- 825 25. Tian F, Luo J, Zhang H, Chang S, Song J. MiRNA expression signatures induced by  
826 Marek's disease virus infection in chickens. *Genomics.* 2012;99(3):152-159.  
827 doi:10.1016/j.ygeno.2011.11.004
- 828 26. Parnas O, Corcoran DL, Cullen BR. Analysis of the mRNA targetome of microRNAs

- 829 expressed by Marek's disease virus. *mBio*. 2014;5(1):e01060-13.  
830 doi:10.1128/mBio.01060-13
- 831 27. Hicks JA, Liu HC. Impact of HVT Vaccination on Splenic miRNA Expression in Marek's  
832 Disease Virus Infections. *Genes (Basel)*. 2019;10(2):115. doi:10.3390/genes10020115
- 833 28. Neerukonda SN, Tavlarides-Hontz P, McCarthy F, Pendarvis K, Parcels MS. Comparison  
834 of the Transcriptomes and Proteomes of Serum Exosomes from Marek's Disease Virus-  
835 Vaccinated and Protected and Lymphoma-Bearing Chickens. *Genes (Basel)*.  
836 2019;10(2):116. doi:10.3390/genes10020116
- 837 29. Luo J, Mitra A, Tian F, Chang S, Zhang H, Cui K, Yu Y, Zhao K, Song J. Histone  
838 methylation analysis and pathway predictions in chickens after MDV infection. *PLoS One*.  
839 2012;7(7):e41849. doi:10.1371/journal.pone.0041849
- 840 30. Mitra A, Luo J, He Y, Gu Y, Zhang H, Zhao K, Cui K, Song J. Histone modifications  
841 induced by MDV infection at early cytolitic and latency phases. *BMC Genomics*.  
842 2015;16(1):311. doi:10.1186/s12864-015-1492-6
- 843 31. Heifetz EM, Fulton JE, O'Sullivan NP, Arthur JA, Cheng H, Wang J, Soller M, Dekkers  
844 JCM. Mapping QTL affecting resistance to Marek's disease in an F6 advanced intercross  
845 population of commercial layer chickens. *BMC Genomics*. 2009;10:20.  
846 doi:10.1186/1471-2164-10-20
- 847 32. Kranis A, Gheyas AA, Boschiero C, Turner F, Yu L, Smith S, Talbot R, Pirani A, Brew  
848 F, Kaiser P, Hocking PM, Fife M, Salmon N, Fulton J, Strom TM, Haberer G, Weigend  
849 S, Preisinger R, Gholami M, Qanbari S, Simianer H, Watson KA, Woolliams JA, Burt  
850 DW. Development of a high density 600K SNP genotyping array for chicken. *BMC*  
851 *Genomics*. 2013;14:59. doi:10.1186/1471-2164-14-59
- 852 33. McElroy JP, Dekkers JC, Fulton JE, O'Sullivan NP, Soller M, Lipkin E, Zhang

- 853 W, Koehler KJ, Lamont SJ, Cheng HH. 2005. Microsatellite markers associated with  
854 resistance to Marek's disease in commercial layer chickens. *Poult Sci.* 2005;84(11):1678-  
855 1688. doi:10.1093/ps/84.11.1678
- 856 34. Heifetz EM, Fulton JE, O'Sullivan NP, Arthur JA, Wang J, Dekkers JC, Soller M. Mapping  
857 quantitative trait loci affecting susceptibility to Marek's disease virus in a backcross  
858 population of layer chickens. *Genetics.* 2007;177(4):2417-2431.  
859 doi:10.1534/genetics.107.080002
- 860 35. Andrews S. FastQC: a quality control tool for high throughput sequence data. 2010,  
861 Available from: <http://www.bioinformatics.babraham.ac.uk/projects/fastqc>
- 862 36. Li H, Durbin R. Fast and accurate short read alignment with Burrows-Wheeler  
863 transform. *Bioinformatics.* 2009;25(14):1754-1760. doi:10.1093/bioinformatics/btp324
- 864 37. Li H, Handsaker B, Wysoker A, Fennell T, Ruan J, Homer N, Marth G, Abecasis G, Durbin  
865 R, and 1000 Genome Project Data Processing Subgroup. The Sequence alignment/map  
866 (SAM) format and SAMtools. *Bioinformatics.* 2009;25(16):2078-2079.  
867 doi:10.1093/bioinformatics/btp352
- 868 38. Cingolani P, Platts A, Wang le L, Coon M, Nguyen T, Wang LL, SJ, Lu X, Ruden DM. A  
869 program for annotating and predicting the effects of single nucleotide polymorphisms,  
870 SnpEff: SNPs in the genome of *Drosophila melanogaster* strain w1118; iso-2; iso-3. *Fly*  
871 (Austin). 2012;6(2):80-92. doi:10.4161/fly.19695
- 872 39. Mosig MO, Lipkin E, Khutoreskaya G, Tchourzyna E, Soller M, Friedmann A. A whole  
873 genome scan for quantitative trait loci affecting milk protein percentage in Israeli-Holstein  
874 cattle, by means of selective milk DNA pooling in a daughter design, using an adjusted  
875 false discovery rate criterion. *Genetics.* 2001;157(4):1683-1698.
- 876 40. Fernando RL, Nettleton D, Southey BR, Dekkers JC, Rothschild MF, Soller M. Controlling

- 877 the proportion of false positives in multiple dependent tests. *Genetics*. 2004;166(1):611-  
878 619. doi:10.1534/genetics.166.1.611
- 879 41. Lipkin E, Strillacci MG, Eitam H, Yishay M, Schiavini F, Soller M, Bagnato A, Shabtay  
880 A. The Use of Kosher Phenotyping for Mapping QTL Affecting Susceptibility to Bovine  
881 Respiratory Disease. *PLoS One*. 2016;11(4):e0153423.  
882 doi:10.1371/journal.pone.0153423
- 883 43. Kuo RI, Tseng E, Eory L, Paton IR, Archibald AL, Burt DW. Normalized long read RNA  
884 sequencing in chicken reveals transcriptome complexity similar to human. *BMC*  
885 *Genomics*. 2017;18(1):323. doi:10.1186/s12864-017-3691-9
- 886 42. Weller JI. *Quantitative Trait Loci Analysis in Animals*. 2<sup>nd</sup> ed. London: CABI Publishing;  
887 2009.
- 888 44. Biggs PM and Payne LN. Studies on Marek's Disease. I. Experimental Transmission, *JNCI:*  
889 *Journal of the National Cancer Institute*. 1967, 39:2, 267–280  
890 <https://doi.org/10.1093/jnci/39.2.267>
- 891 45. Khare ML, Grun J, Adams EV. Marek's disease in Japanese quail -- a pathological,  
892 virological and serological study. *Poult Sci*. 1975;54(6):2066-2068.  
893 doi:10.3382/ps.0542066
- 894 46. Bettridge JM, Lynch SE, Brena MC, Melese K, Dessie T, Terfa ZG, Desta TT, Rushton S,  
895 Hanotte O, Kaiser P, Wigley P, Christley RM. Infection-interactions in Ethiopian village  
896 chickens. *Prev Vet Med*. 2014;117(2):358-366. doi:10.1016/j.prevetmed.2014.07.002
- 897 47. Kim D, Pertea G, Trapnell C, Pimentel H, Kelley R, Salzberg SL. TopHat2: accurate  
898 alignment of transcriptomes in the presence of insertions, deletions and gene  
899 fusions. *Genome Biol*. 2013;14(4):R36. doi:10.1186/gb-2013-14-4-r36
- 900 48. Langmead B, Salzberg SL. Fast gapped-read alignment with Bowtie 2. *Nat Methods*.

- 901           2012;9(4):357-359. doi:10.1038/nmeth.1923
- 902   49. Trapnell C, Hendrickson DG, Sauvageau M, Goff L, Rinn JL, Pachter L. Differential  
903       analysis of gene regulation at transcript resolution with RNA-seq. *Nat Biotechnol.*  
904       2013;31(1):46-53. doi:10.1038/nbt.2450
- 905   50. Perumbakkam S, Muir WM, Black-Pyrkosz A, Okimoto R, Cheng HH. Comparison and  
906       contrast of genes and biological pathways responding to Marek's disease virus infection  
907       using allele-specific expression and differential expression in broiler and layer  
908       chickens. *BMC Genomics.* 2013;14:64. doi:10.1186/1471-2164-14-64
- 909   51. Hindorff LA, Sethupathy P, Junkins HA, Ramos EM, Mehta JP, Collins FS, Manolio TA.  
910       Potential etiologic and functional implications of genome-wide association loci for  
911       human diseases and traits. *Proc Natl Acad Sci USA.* 2009;106(23):9362-9367.  
912       doi:10.1073/pnas.0903103106
- 913   52. Semagn K, Beyene Y, Warburton ML, Tarekegne A, Mugo S, Meisel B, Sehabiague  
914       P, Prasanna BM. Meta-analyses of QTL for grain yield and anthesis silking interval in 18  
915       maize populations evaluated under water-stressed and well-watered environments. *BMC*  
916       *Genomics.* 2013;14:313. doi:10.1186/1471-2164-14-313
- 917   53. Fulton JE, McCarron AM, Lund AR, Pinegar KN, Wolc A, Chazara O, Bed'Hom B, Berres  
918       M, Miller MM. A high-density SNP panel reveals extensive diversity, frequent  
919       recombination and multiple recombination hotspots within the chicken major  
920       histocompatibility complex B region between BG2 and CD1A1. *Genet Sel Evol.*  
921       2016;48:1. doi:10.1186/s12711-015-0181-x
- 922   54. Vallejo, RL, Bacon LD, Liu HC, Witter RL, Groenen MA, Hillel J, Cheng HH. Genetic  
923       mapping of quantitative trait loci affecting susceptibility to Marek's disease virus induced  
924       tumors in F2 intercross chickens. *Genetics.* 1998;148(1):349-360.



- 925 55. Yonash N, Bacon LD, Witter RL, Cheng HH. High resolution mapping and identification  
926 of new quantitative trait loci (QTL) affecting susceptibility to Marek's disease. *Anim*  
927 *Genet.* 1999;30(2):126-135. doi:10.1046/j.1365-2052.1999.00457.x
- 928 56. Cheng H, Niikura M, Kim T, Mao W, MacLea KS, Hunt H, Dodgson J, Burnside  
929 J, Morgan R, Ouyang M, Lamont S, Dekkers J, Fulton J, Soller M, Muir W. Using  
930 integrative genomics to elucidate genetic resistance to Marek's disease in chickens. *Dev*  
931 *Biol (Basel).* 2008; 132:365-372. doi:10.1159/000317187
- 932 57. Goto RM, Wang Y, Taylor Jr. RL, Wakenell PS, Hosomichi K, Shiina T, Blackmore  
933 CS, Briles WE, Miller MM. BG1 has a major role in MHC-linked resistance to  
934 malignant lymphoma in the chicken. *Proc Natl Acad Sci USA.* 2009;106(39):16740-  
935 16745. doi:10.1073/pnas.0906776106
- 936
- 937
- 938
- 939
- 940
- 941
- 942
- 943
- 944
- 945
- 946

947 **Figures**

948

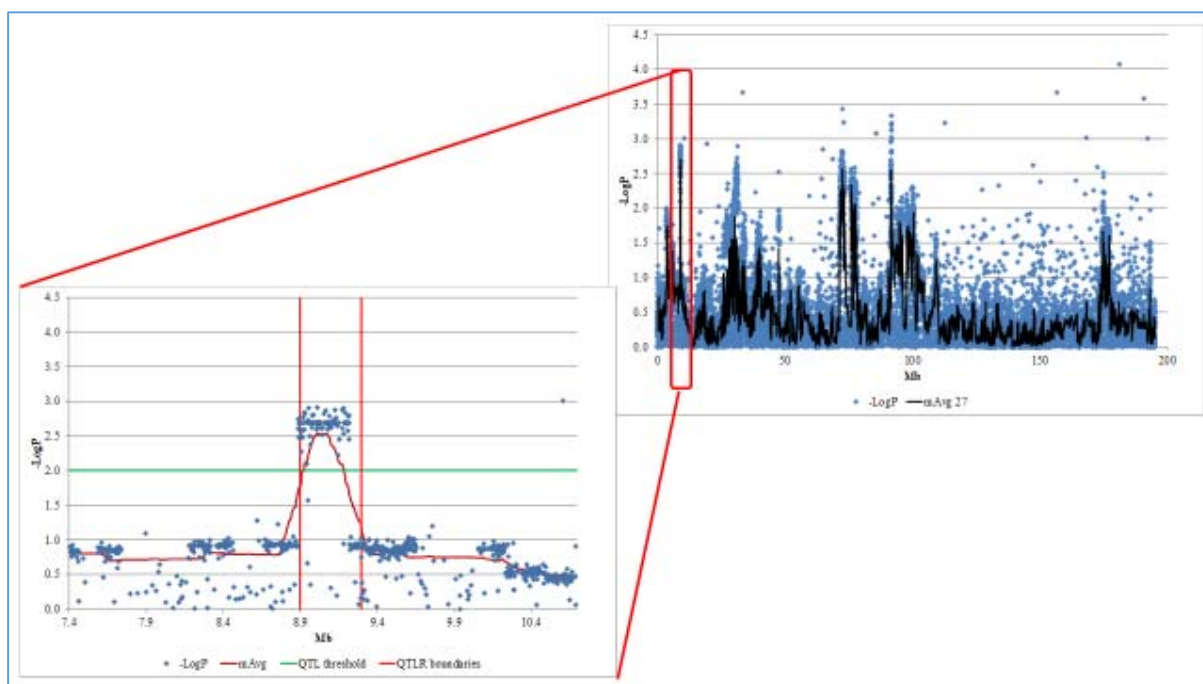

949

950

951

952 **Figure 1:** Manhattan plot of a significant F<sub>6</sub> QTLR (Family 3: QTLR 1, Chromosome 1). LogP,  
953  $-\log_{10}P$  of a single marker; mAvg, moving average of  $-\text{LogP}$  values of a window of 27 markers;  
954 QTLR boundaries, boundaries of the QTL region obtained by Log Drop 1 (see Methods).

955

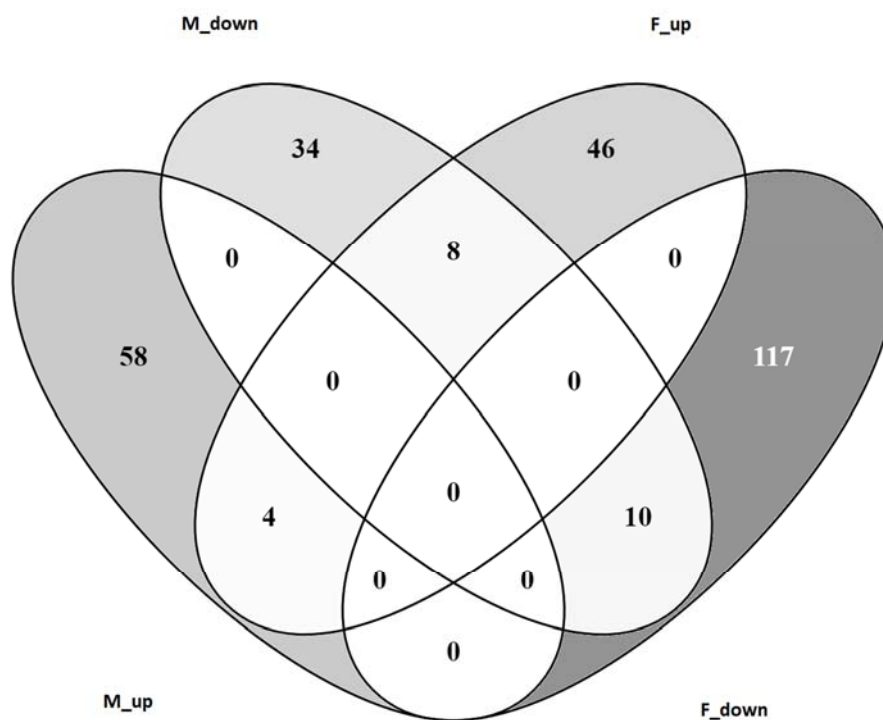

956

957 **Figure 2:** Venn diagram showing the intersection of host responses in male and female W36  
958 birds. M-up – number of genes up regulated in male birds; M-down - number of genes down  
959 regulated in male birds; F-up – number of genes up regulated in female birds; F-down - number  
960 of genes down regulated in female birds.

961

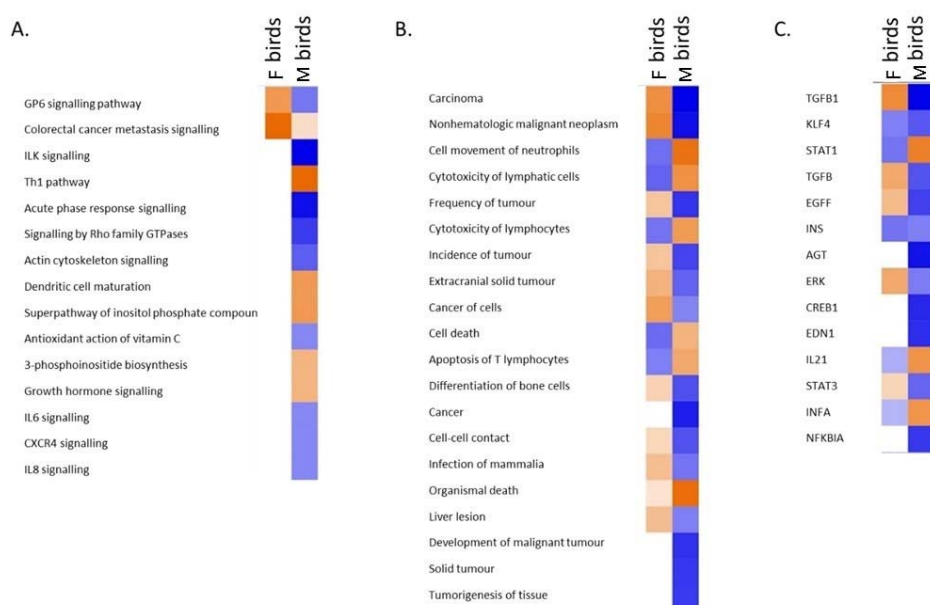

962

963

964 **Figure 3:** Comparison of the gene expression underlying the host response in W36 birds.  
 965 Orange colours represent up-regulation while blue indicates down-regulation. Differential  
 966 activation/repression is indicated as shown: (A). Biological pathways (B). Diseases and  
 967 biofunctions (C). Upstream regulators.

968

969

970

971

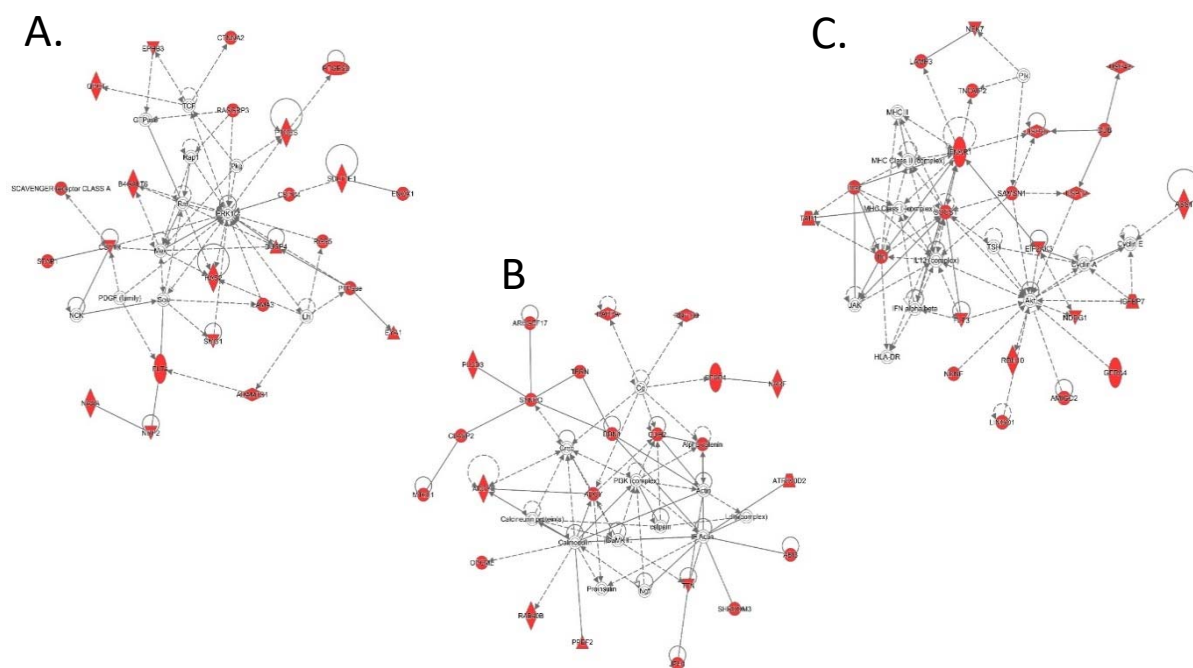

972  
973

974 **Figure 4:** Gene networks represented by differentially expressed genes found under the 38  
975 significant QTLR. Genes coloured in red are genes within the network which are in the dataset  
976 under study. (A). cell movement, cell signalling and cancer (B). Cell signalling and nervous  
977 system development and (C). Antimicrobial resistance, inflammation, and cell death.

978  
979

## 980 **Supplementary Files**

981 S1 Table – Primers

982 S1 Figure – Manhattan plots of significant QTLR

983 S2 Table – Ensembl genes under QTLR

984 S3 Table – Variants under QTLR

985 S4 Table – Differentially expressed genes

986 S5 Table – QTLR genes also differentially expressed

987 S6 Table – Gene ontology terms

988 S7 Table – All markers used in association tests

- 989 S8 Table – Association test results (p-values)
- 990 S9 Table – Summary of element x line tests
- 991 S1 File – Details of association by individual QTLR

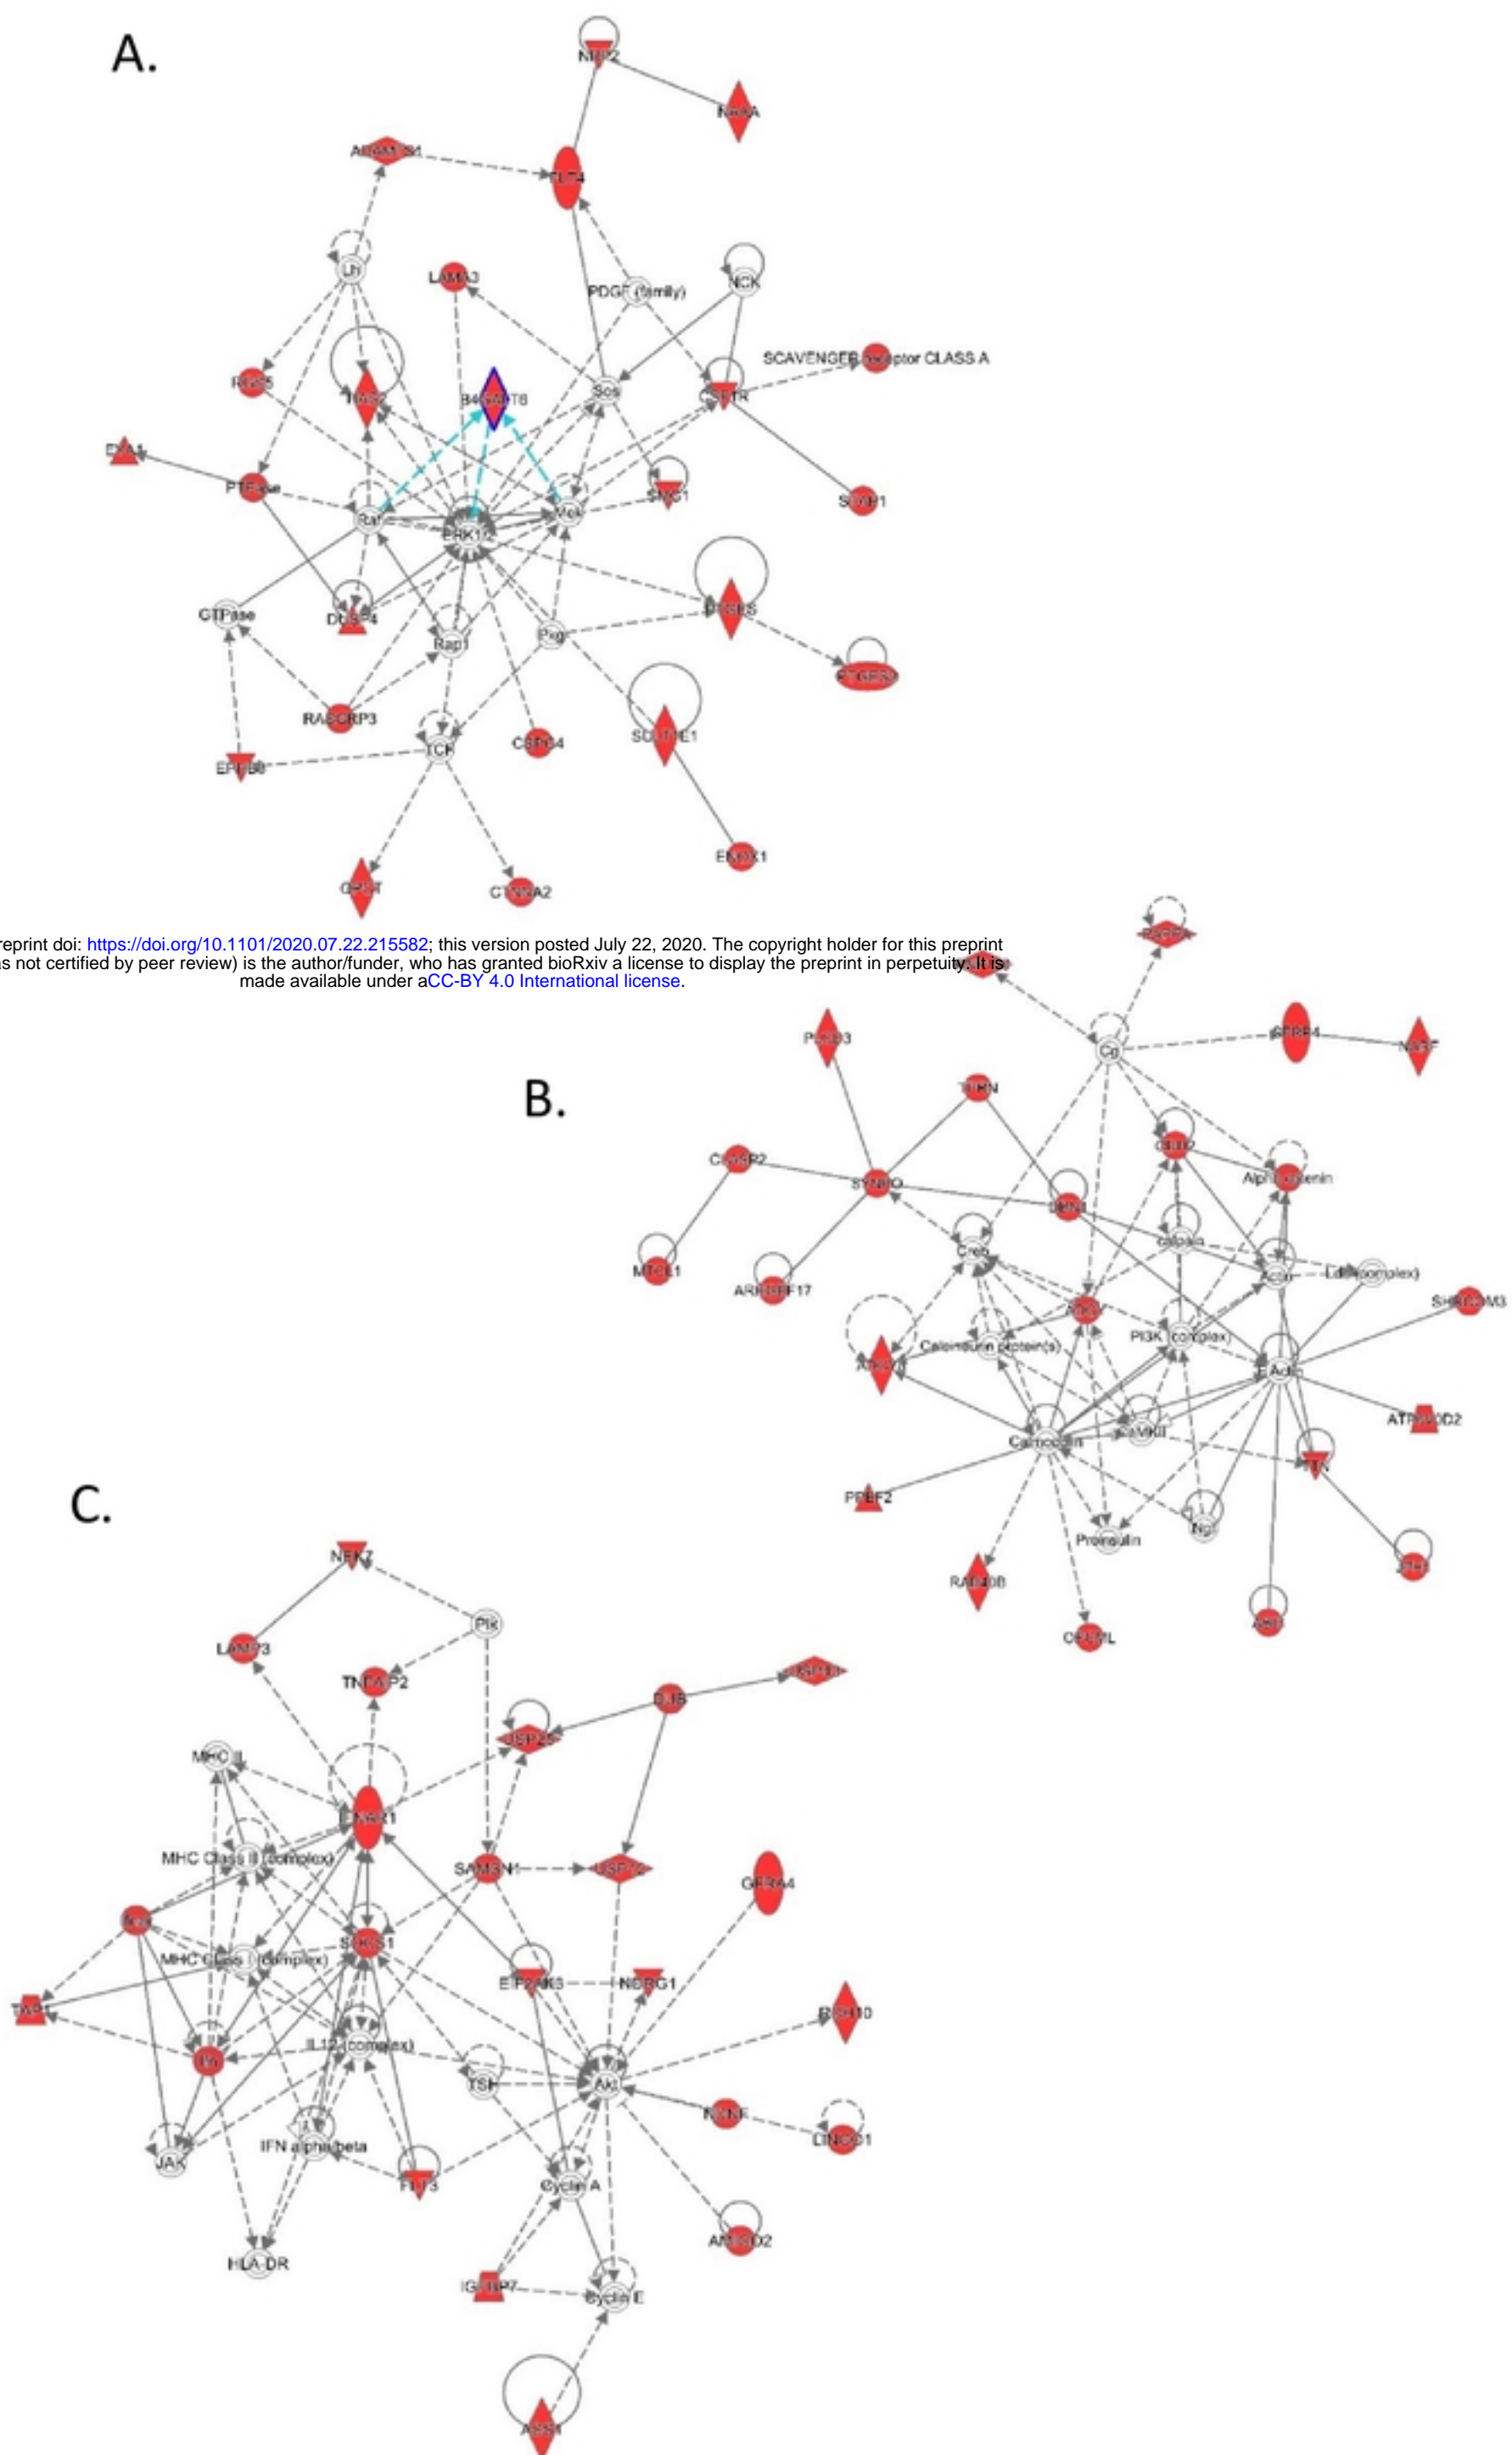

**Figure 4:** Gene networks represented by differentially expressed genes found under the 38 significant QTLR. Genes coloured in red are genes within the network which are in the dataset under study. **(A).** cell movement, cell signalling and cancer **(B).** Cell signalling and nervous system development and **(C).** Antimicrobial resistance, inflammation, and cell death.
